1 **FER-LIKE FE DEFICIENCY-INDUCED TRANSCRIPTION FACTOR (OsFIT)**  
2 **interacts with OsIRO2 to regulate iron homeostasis**

3 Gang Liang<sup>a, b\*</sup>, Huimin Zhang<sup>a</sup>, Yang Li<sup>a, b</sup>, Mengna Pu<sup>a,b</sup>, Yujie Yang<sup>a,b,c</sup>,  
4 Chenyang Li<sup>a,b,c</sup>, Chengkai Lu<sup>a, b</sup>, Peng Xu<sup>a,b,c</sup>, Diqiu Yu<sup>a,d</sup>

5 \*

6

7 <sup>a</sup>CAS Key Laboratory of Tropical Plant Resources and Sustainable Use,  
8 Xishuangbanna Tropical Botanical Garden, The Innovative Academy of Seed  
9 Design, Chinese Academy of Sciences, Kunming, Yunnan 650223, China.

10 <sup>b</sup>Center of Economic Botany, Core Botanical Gardens, Chinese Academy of  
11 Sciences, Menglun, Mengla, Yunnan 666303, China

12 <sup>c</sup>University of Chinese Academy of Sciences, Beijing 100049, China

13 <sup>d</sup>State Key Laboratory for Conservation and Utilization of Bio-Resources in  
14 Yunnan, Yunnan University, Kunming 650091, China

15 \* Correspondence:

16 [lianggang@xtbg.ac.cn](mailto:lianggang@xtbg.ac.cn)

17 [ydq@xtbg.ac.cn](mailto:ydq@xtbg.ac.cn)

18

19 **Short title:** Interaction of OsFIT and OsIRO2 in Fe homeostasis

20

21 **One-sentence summary:** OsFIT interacts with and facilitates the  
22 accumulation of OsIRO2 in the nucleus where the OsFIT-OsIRO2 transcription  
23 complex initiates the transcription of Fe deficiency responsive genes.

24

25 -----

26 The author responsible for distribution of materials integral to the findings  
27 presented in this article in accordance with the policy described in the  
28 Instructions for Authors ([www.plantphysiol.org](http://www.plantphysiol.org)) is: Diqiu Yu(ydq@xtbg.ac.cn).

29

30

31

32 **ABSTRACT**

33

34 There are two Fe-uptake strategies for maintaining Fe homeostasis in plants.  
35 As a special graminaceous plant, rice applies both strategies. However, it  
36 remains unclear how these two strategies are regulated in rice.  
37 IRON-RELATED BHLH TRANSCRIPTION FACTOR 2 (*OsIRO2*) is critical for  
38 regulating Fe uptake in rice. In this study, we identified an interacting partner of  
39 *OsIRO2*, *Oryza sativa* FER-LIKE FE DEFICIENCY-INDUCED  
40 TRANSCRIPTION FACTOR (*OsFIT*), which encodes a bHLH transcription  
41 factor. The *OsIRO2* protein is localized in the cytoplasm and nucleus, but  
42 *OsFIT* facilitates the accumulation of *OsIRO2* in the nucleus. Loss-of-function  
43 mutations to *OsFIT* result in decreased Fe accumulation, severe Fe-deficiency  
44 symptoms, and disrupted expression of Fe-uptake genes. In contrast, *OsFIT*  
45 overexpression promotes Fe accumulation and the expression of Fe-uptake  
46 genes. Genetic analyses indicated that *OsFIT* and *OsIRO2* function in the  
47 same genetic node. Further analysis suggested that *OsFIT* and *OsIRO2* form  
48 a functional transcription activation complex to initiate the expression of  
49 Fe-uptake genes. Our findings provide a mechanism understanding of how  
50 rice maintains Fe homeostasis.

51

52

53

54

55

56

57

58

59

60

## 61 INTRODUCTION

62

63 Iron (Fe) is necessary for plant growth and development because it is involved  
64 in many physiological and biochemical reactions. Although Fe is the second  
65 most abundant metal element in the earth crust, Fe availability is extremely low  
66 in highly alkaline soils, especially calcareous soils (Mori, 1999). Fe deficiency  
67 can cause serious agricultural problems, such leaf chlorosis as well as  
68 diminished plant growth and crop yield. Therefore, maintaining Fe  
69 homeostasis is important for ensuring plant growth and development.

70 Plants have evolved two strategies for increasing the efficiency of Fe uptake  
71 from soil (Marschner et al., 1986). Graminaceous plants apply strategy II,  
72 which involves the synthesis and secretion of mugineic acid family  
73 phytosiderophores (MAs) that solubilize and chelate Fe(III) in the rhizosphere  
74 for the subsequent absorption of MA-Fe(III) via plasma membrane transporters.  
75 In contrast, non-graminaceous plants employ strategy I, which requires the  
76 acidification of the rhizosphere to promote Fe release, the reduction of Fe(III)  
77 to Fe(II) at the root surface, and the subsequent uptake of Fe(II). Recent  
78 studies suggest that Arabidopsis also secretes Fe-chelating compounds, such  
79 as coumarins (Rodriguez-Celma and Schmidt, 2013; Fourcroy et al., 2014;  
80 Schmid et al., 2014; Siwinska et al., 2018; Tsai et al., 2018).

81 The key genes involved in both Fe-uptake strategies have been  
82 characterized in Arabidopsis and rice. Regarding Arabidopsis strategy I, the  
83 rhizosphere acidification in response to Fe deficiency is mediated by the  
84 plasma membrane H<sup>+</sup>-ATPase 2 (AHA2) (Santi and Schmidt, 2009), and the  
85 subsequent Fe(III) reduction and Fe(II) transport are mediated by FERRIC  
86 REDUCTASE 2 (FRO2) (Robinson et al., 1999) and IRON TRANSPORTER 1  
87 (IRT1) (Connolly et al., 2002; Varotto et al., 2002; Vert et al., 2002). In rice,  
88 MAs are synthesized via the conversion of methionine to 2'-deoxymugineic  
89 acid in four sequential steps mediated by S-adenosylmethionine synthetase  
90 (SAMS), nicotianamine synthase (NAS), nicotianamine aminotransferase

91 (NAAT), and deoxymugineic acid synthase (DMAS) (Bashir et al., 2006; Mori,  
92 1999; Shojima et al., 1990). Additionally, TRANSPORTER OF MAs 1  
93 (OsTOM1) mediates the efflux of MAs (Nozoye et al., 2011) and YELLOW  
94 STRIP LIKE 15 (OsYSL15) mediates the influx of MA-Fe(III) (Inoue et al., 2009;  
95 Lee et al., 2009). In addition to strategy II based on MAs, rice also partially  
96 employs strategy I involving the direct uptake of Fe(II) by OsIRT1 (Ishimaru et  
97 al., 2006).

98 Under Fe-deficient conditions, plants detect changes in the internal Fe  
99 concentration, after which the Fe uptake system is activated. Considerable  
100 progress has been made regarding the characterization of the  
101 Fe-deficiency-responsive signaling pathway in plants (Gao et al., 2019; Wu  
102 and Ling, 2019; Schwarz and Bauer, 2020). In Arabidopsis, BTS is a putative  
103 Fe sensor because its hemerythrin motifs bind to Fe and it contains a Really  
104 Interesting New Gene (RING) domain associated with ubiquitination activity.  
105 Additionally, BTS negatively regulates Fe homeostasis by interacting with  
106 AtbHLH105 and AtbHLH115 to induce their degradation (Selote et al., 2015).  
107 In response to Fe deficiency, Arabidopsis bHLH IVc transcription factors (TFs)  
108 (AtbHLH34, AtbHLH104, AtbHLH105, and AtbHLH115) activate the expression  
109 of bHLH Ib genes (*AtbHLH38*, *AtbHLH39*, *AtbHLH100*, and *AtbHLH101*) and  
110 *AtPYE* (Zhang et al., 2015; Li et al., 2016; Liang et al., 2017). Moreover, bHLH  
111 Ib TFs interact with AtFIT to activate the expression of strategy I genes *AtIRT1*  
112 and *AtFRO2* (Yuan et al., 2008; Wang et al., 2013). A similar regulatory  
113 network also occurs in rice. As the homologs of BTS, OsHRZ1 and OsHRZ2  
114 were identified as putative rice Fe sensors that also contain hemerythrin motifs  
115 and a RING domain (Kobayashi et al., 2013). Previous studies revealed that  
116 OsHRZ1 negatively regulates Fe homeostasis by mediating the degradation of  
117 OsPRI1, OsPRI2, and OsPRI3 (orthologs of Arabidopsis bHLH IVc), which  
118 positively regulate Fe homeostasis by directly targeting *OsIRO2* (homolog of  
119 Arabidopsis bHLH Ib) and *OsIRO3* (homolog of *AtPYE*) (Zhang et al., 2017,  
120 2020; Kobayashi et al., 2019). Both *OsIRO2* and *OsIRO3* exhibit upregulated

121 expression in response to Fe deficiency and their products positively and  
122 negatively regulate Fe homeostasis, respectively (Ogo et al., 2006, 2007;  
123 Zheng et al. 2010). As the rice ortholog of Arabidopsis bHLH 1b, OsIRO2  
124 controls the expression of strategy II genes *OsNAS1*, *OsNAS2*, *OsNAAT1*,  
125 *OsDMAS1*, and *OsYSL15* (Ogo et al., 2007).

126 In this study, we functionally characterize OsFIT, which interacts with  
127 OsIRO2 and positively regulates rice Fe homeostasis. OsIRO2 recognizes and  
128 OsFIT activates the promoters of their target genes, such as *OsNAS2* and  
129 *OsYSL15*. Our data suggest that OsFIT and OsIRO2 function as a  
130 transcription complex to regulate Fe homeostasis.

131

132

133 **RESULTS**

134

135 **OsFIT physically interacts with OsIRO2**

136

137 Yeast two-hybrid (Y2H) assays were used to identify the interacting partners of  
138 OsIRO2. Because of the considerable self-activation of the full-length OsIRO2  
139 (Supplemental Figure S1A), we used a truncated OsIRO2 (i.e., OsIRO2-N), in  
140 which 98 amino acids were deleted from the C terminus, as the bait for the  
141 Y2H screening of an iron-depleted rice cDNA library. Six of 112 positive clones  
142 contained the same prey protein, bHLH156 (Os04g0381700) (Supplemental  
143 Table S1), which was named *Oryza sativa* FER-LIKE FE  
144 DEFICIENCY-INDUCED TRANSCRIPTION FACTOR (OsFIT) because its  
145 protein sequence is similar to AtFIT (Supplemental Figure S1B). The full-length  
146 *OsFIT* coding region was cloned, after which the interaction between OsFIT  
147 and OsIRO2 was confirmed in yeast cells (Figure 1A).

148 To further verify that OsIRO2 interacts with OsFIT in plant cells, we  
149 employed the tripartite split-GFP system (Liu et al., 2018). The full-length  
150 OsIRO2 protein was fused to the GFP10 fragment (GFP10-OsIRO2), whereas  
151 the full-length OsFIT was fused to the GFP11 fragment (OsFIT-GFP11). When  
152 GFP10-OsIRO2 and OsFIT-GFP11 were transiently co-expressed with  
153 GFP1-9 in tobacco leaves, the GFP signal was detected in the nucleus (Figure  
154 1B). In contrast, a GFP signal was undetectable in cells containing control  
155 vectors.

156 We next conducted the co-immunoprecipitation assays to confirm the  
157 interaction between OsIRO2 and OsFIT *in planta*. The Myc-tagged OsIRO2  
158 and the HA-tagged OsFIT were transiently co-expressed in tobacco leaves.  
159 The proteins were incubated with the anti-Myc antibody and A/G-agarose  
160 beads and then separated by SDS-PAGE for immunoblotting with the anti-HA  
161 and anti-MYC antibodies. Consistent with the results of the Y2H and tripartite  
162 split-GFP assays, OsIRO2 and OsFIT were detected in the same protein

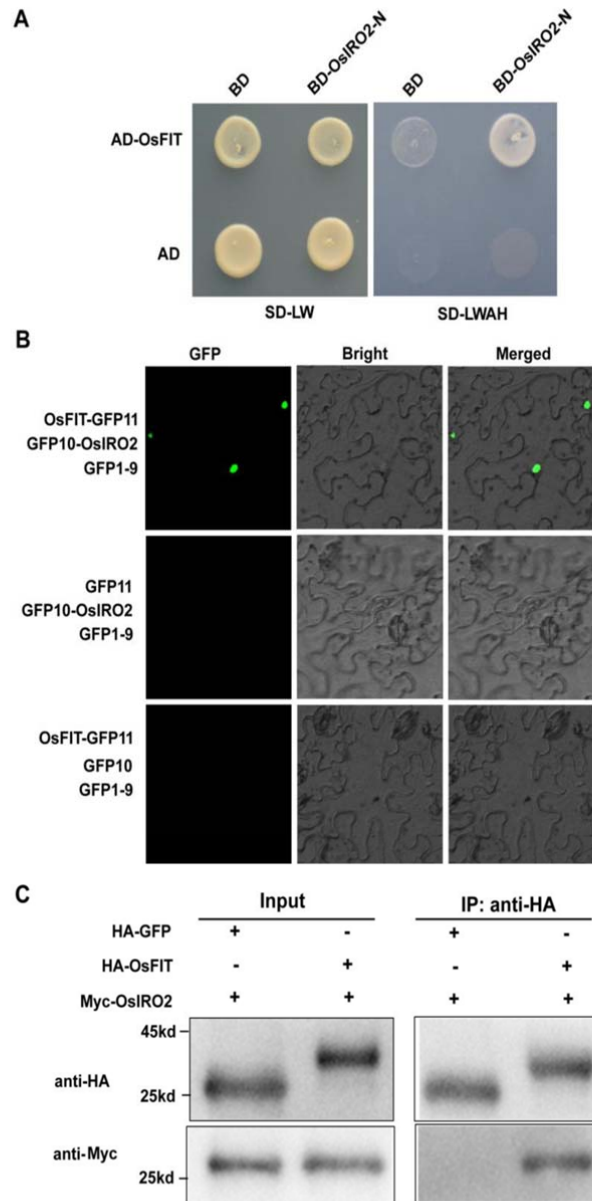

**Figure 1.** OsFIT physically interacts with OsIRO2.

**(A)** Yeast two-hybrid analysis of the interaction between OsIRO2 and OsFIT. Yeast cotransformed with different BD and AD plasmid combinations was spotted on synthetic dropout medium lacking Leu/Trp (SD-W/L) or Trp/Leu/His/Ade (SD-W/L/H/A). **(B)** Fluorescence complementation between OsIRO2 and OsFIT. Three different combinations (GFP1-9/GFP10-OsIRO2/OsFIT-GFP11, GFP1-9/GFP10/OsFIT-GFP11, and GFP1-9/GFP10-OsIRO2/GFP11) were co-expressed respectively in tobacco leaves. **(C)** Co-IP analysis of the interaction between OsIRO2 and OsFIT. Total proteins from different combinations (HA-GFP/Myc-OsIRO2 and HA-OsFIT/Myc-OsIRO2) were immunoprecipitated with anti-Myc followed by immunoblotting with the indicated antibodies.

164 with OsFIT.

165

### 166 **OsFIT promotes the nuclear accumulation of OsIRO2**

167

168 To investigate the effects of OsFIT on Fe homeostasis, we determined whether  
169 *OsFIT* expression is responsive to Fe deficiency. Wild-type seedlings grown in  
170 0.1 mM Fe(III) solution (+Fe) for 5 days were shifted to a +Fe or Fe-free  
171 solution (-Fe) for 5 days. The roots and shoots were harvested separately for  
172 RNA extraction. A quantitative real-time polymerase chain reaction (qRT-PCR)  
173 assay was conducted to analyze the expression of both *OsIRO2* and *OsFIT*  
174 (Figure 2A). In agreement with previous studies (Ogo et al., 2006, 2007),  
175 *OsIRO2* expression increased in the roots and shoots under -Fe conditions.  
176 Similarly, *OsFIT* expression in the roots and shoots was also upregulated  
177 under -Fe conditions. Further analysis indicated that *OsFIT* is expressed  
178 preferentially in the roots rather than shoots (Figure 2B).

179 To further examine the spatiotemporal *OsFIT* expression pattern, a  
180 construct comprising a  $\beta$ -glucuronidase (GUS) gene under the control of the  
181 3.2-kb putative promoter upstream of *OsFIT* was prepared and transferred into  
182 wild-type rice. The GUS stain was detected in the roots and shoots and was  
183 more intense under -Fe conditions than under +Fe conditions (Supplemental  
184 Figure S2).

185 Subsequently, we examined the subcellular localization of OsFIT and  
186 OsIRO2 (Figure 2C). The full-length OsIRO2 was fused in frame with the  
187 mCherry and the full-length OsFIT with the GFP under the control of the CaMV  
188 35S promoter. When transiently expressed in tobacco cells, OsFIT-GFP was  
189 exclusively targeted to the nucleus, whereas OsIRO2-mCherry was mainly  
190 localized in the cytoplasm. Their different subcellular localizations and  
191 interaction in the nucleus prompted us to investigate whether OsFIT influences  
192 the localization of OsIRO2. When equal amounts of OsIRO2-mCherry and  
193 OsFIT-GFP were mixed and transiently co-expressed, the fluorescence signal



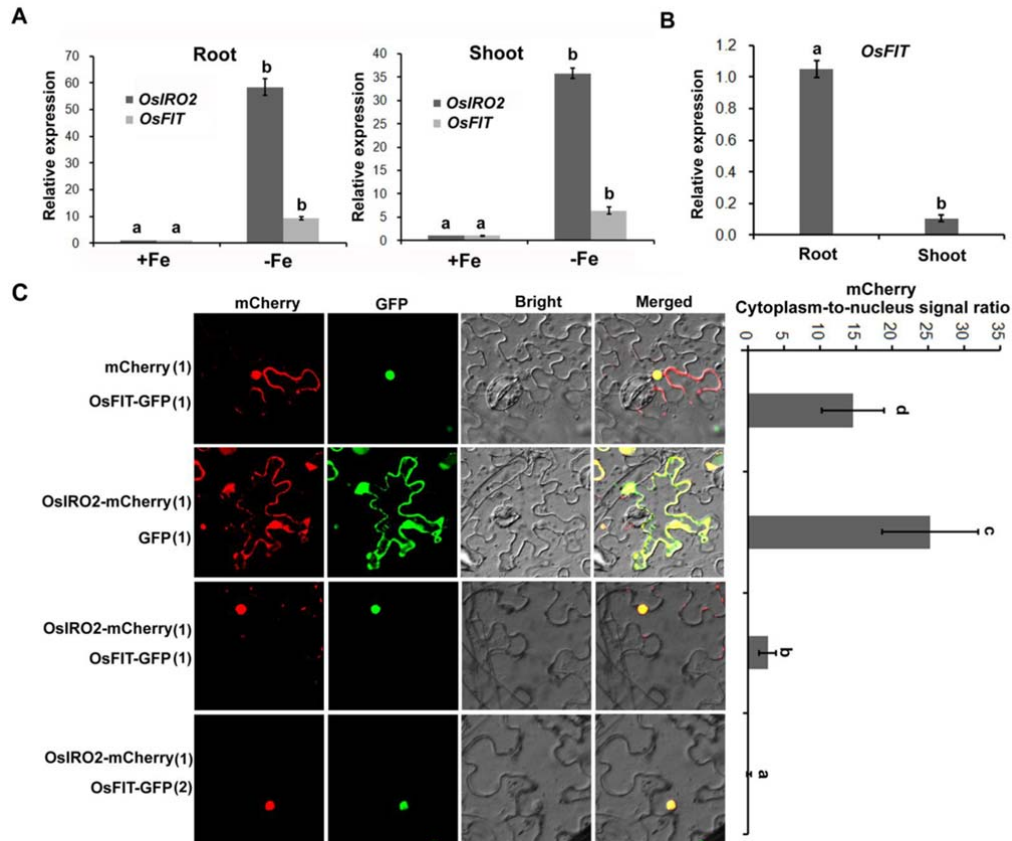

**Figure 2.** OsFIT facilitates the accumulation of OsIRO2 in the nucleus.

(A) Response of *OsFIT* to Fe deficiency. Four-day-old seedlings germinated in wet paper were grown in 0.1 mM Fe (III) solution (+Fe) for 5 days and then transferred to +Fe or Fe free solution (-Fe) for 5 days. (B) *OsFIT* expression in the roots and shoots. Four-day-old seedlings germinated in wet paper were grown in 0.1 mM Fe (III) solution (+Fe) for 10 days. (A) and (B) Roots and shoots were harvested separately and used for RNA extraction and qRT-PCR. Data represent means  $\pm$  SD ( $n = 3$ ). (C) Subcellular localization. Different combinations of OsIRO2-mCherry, OsFIT-GFP, free GFP or free mCherry were expressed transiently in tobacco cells. The numbers in the parenthesis indicate the relative proportion of agrobacteria in each combination. Quantification of subcellular distribution of the mCherry tagged proteins are shown on the right. Data represent means  $\pm$  SD ( $n = 10$ ). (A-C) Different letters above each bar indicate statistically significant differences as determined by one-way ANOVA followed by Tukey's multiple comparison test ( $P < 0.05$ ).

194 of cytoplasm OsIRO2-mCherry decreased significantly. As the proportion of  
 195 OsFIT-GFP increased, almost all OsIRO2-mCherry concentrated in the  
 196 nucleus. These results suggested that OsFIT promotes the nuclear  
 197 accumulation of OsIRO2.

198

### 199 **Loss-of-function of *OsFIT* impairs tolerance to Fe limitation**

200

201 To investigate the physiological functions of OsFIT, the CRISPR/Cas9 editing

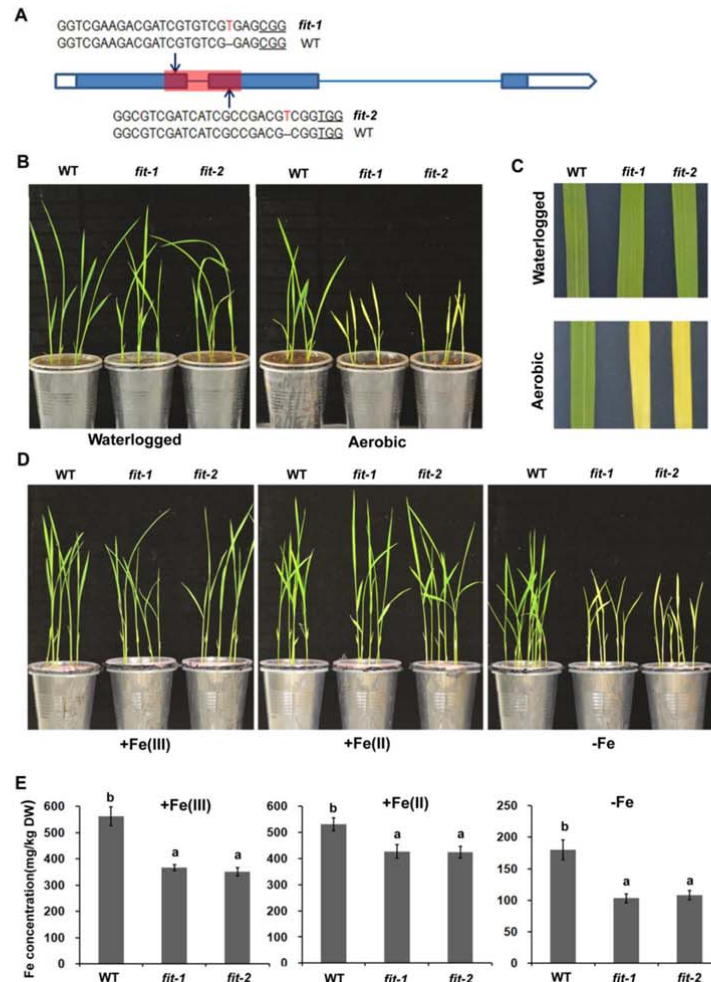

**Figure 3.** Phenotypes of *fit* mutants. **(A)** CRISPR/Cas9-edited *fit* mutants. The underlined three letters indicate the PAM region. Arrows indicate the positions of single guide RNAs. The red letter indicates the 1bp insertion. The red bar indicates the bHLH domain. **(B)** Growth of *fit* mutant seedlings under aerobic conditions and water logged. Two-week-old seedling are shown. **(C)** The third leaves of seedlings in (B). **(D)** Growth of *fit* mutant seedlings. Seeds were germinated on wet paper for four days. For Fe (III) and Fe (II) growth, four-day-old seedlings germinated on wet paper were shifted in 0.1 mM Fe(III) and Fe (II) solution respectively for 10 days. For -Fe growth, four-day-old seedlings germinated on wet paper were shifted to +Fe for 1 day and then transferred to -Fe for 9 days. **(E)** Fe concentration of shoots in (D). Data represent means  $\pm$  SD ( $n = 3$ ). Different letters above each bar indicate statistically significant differences as determined by one-way ANOVA followed by Tukey's multiple comparison test ( $P < 0.05$ ).

202 system was employed to edit the *OsFIT* gene. Two target sites within the bHLH  
 203 domain were designed and respectively integrated into the CRISPR/Cas9  
 204 editing vector (Supplemental Figure S3A), which were introduced into  
 205 wild-type rice via *Agrobacterium tumefaciens*-mediated transformation. Two  
 206 homozygous mutants (*fit-1* and *fit-2*) were identified by a sequencing analysis  
 207 (Figure 3A). Both mutants contain a T insertion in the bHLH domain, which

208 introduced a STOP codon in the *fit-1* and caused the frame-shift mutation in  
209 the *fit-2* (Supplemental Figure S3B). Further expression analysis indicated that  
210 the *OsFIT* expression was lower in both mutants than in the wild-type  
211 (Supplemental Figure S3C).

212 When the *fit* mutants were grown in aerobic soil, the plants exhibited  
213 delayed development and severe chlorosis (Figure 3B, C; Supplemental  
214 Figure S3D). When grown in waterlogged soil, no visible phenotypic  
215 differences were observed between the *fit* mutants and wild-type plants  
216 (Figure 3B, C). Rice mainly uses strategy II to obtain Fe in aerobic soil lacking  
217 soluble Fe(II) (Liu et al., 2019). We speculated that the strategy II components  
218 were damaged in the *fit* mutants. To confirm our hypothesis, we performed  
219 hydroponic experiments involving a nutrient solution with various Fe contents  
220 [+Fe(III), 0.1 mM EDTA-Fe(III); +Fe(II), 0.1 mM EDTA-Fe(II); and -Fe, Fe free].  
221 Regardless of the presence of Fe(III) or Fe(II), the *fit* mutants and the wild-type  
222 plants developed similarly; however, under -Fe conditions, the *fit* mutants  
223 exhibited Fe-deficiency hypersensitive phenotypes (i.e., very poor growth and  
224 extensive leaf chlorosis) (Figure 3D). Furthermore, a comparison of Fe  
225 concentrations indicated that the *fit* mutants accumulated less Fe than the  
226 wild-type plants regardless of Fe status (Figure 3E).

227

## 228 **Loss-of-function mutations to *OsFIT* disrupt the expression of Fe** 229 **homeostasis-associated genes**

230

231 To evaluate the effect of *OsFIT* mutations on the rice Fe-uptake system, we  
232 performed an Affymetrix GeneChip analysis. Nine-day-old seedlings grown in  
233 +Fe solution were shifted to +Fe or -Fe solution for 5 days. The shoots and  
234 roots were harvested separately for a GeneChip analysis (Figure 4A;  
235 Supplemental Figure S4A). The results revealed that among 741 genes  
236 upregulated by Fe depletion in the wild-type roots, 367 (50%) were  
237 downregulated in the *fit-1* mutant relative to the wild-type expression level.

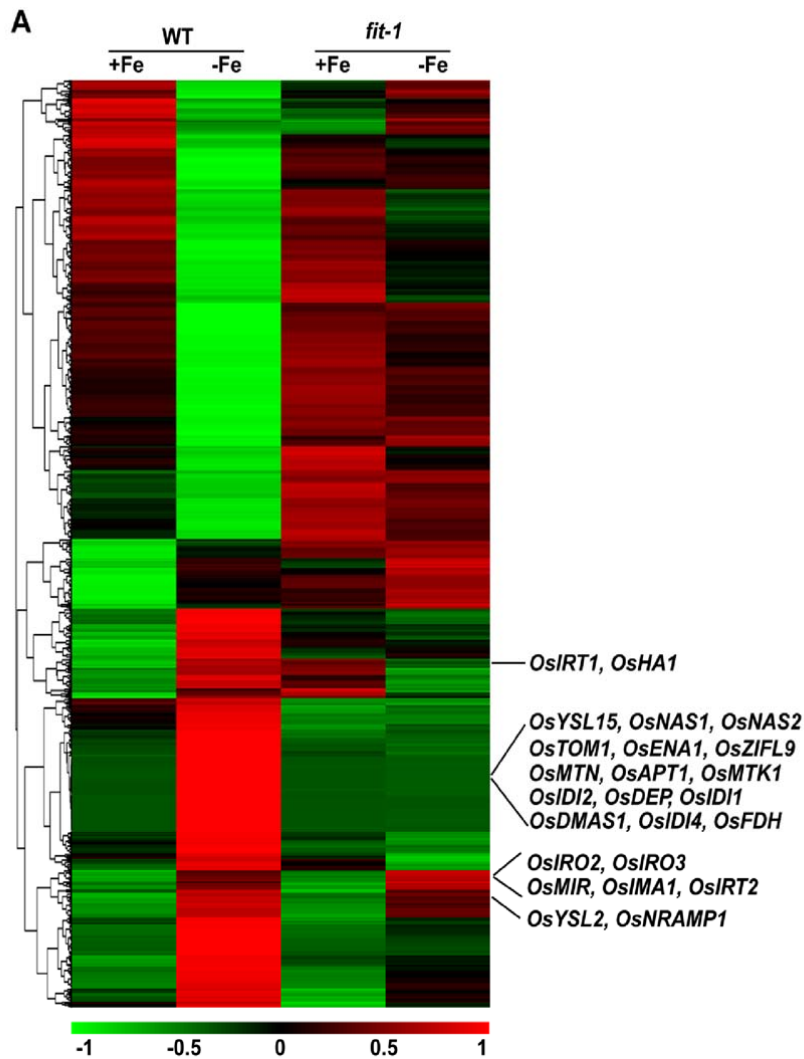

**B**

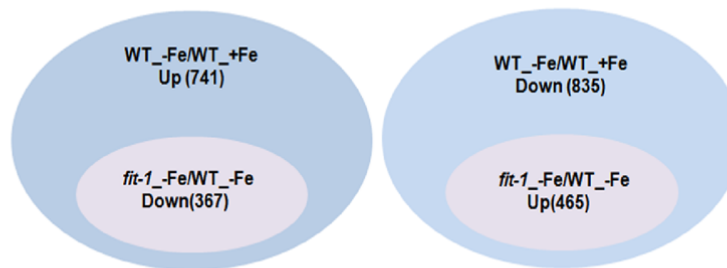

**Figure 4.** OsFIT transcriptional regulation of Fe homeostasis genes in the roots. **(A)** Heat map of 741 upregulated genes and 835 downregulated genes in wild type roots. **(B)** Fe deficiency responsive genes affected by OsFIT in the roots. Among the 741 upregulated genes by  $-Fe$  in the wild-type, 367 genes were down-regulated in the *fit-1* compared with in the wild type under  $-Fe$ . Among the 835 down-regulated genes by  $-Fe$  in the wild-type, 465 genes were upregulated in the *fit-1* compared with in the wild type under  $-Fe$ .

239 roots, 465 (55%) were upregulated in the *fit-1* mutant (Figure 4B). In contrast,  
240 the gene expression levels were less affected in the shoots (Supplemental  
241 Figure S4B). We noted that the root expression levels of a group of genes  
242 involved in Fe uptake were substantially lower in the *fit-1* mutant than in the  
243 wild-type control (Table 1). These genes included strategy I genes (*OsIRT1*  
244 and *OsHA1*) and strategy II genes (*OsYSL9/15/16*, *OsTOM1*, *OsENA1*, and  
245 *OsZIFL9*). The genes associated with NA and DMA syntheses (*OsMTN*,  
246 *OsAPT1*, *OsMTK1*, *OsIDI1/2/4*, *OsDEP*, *OsFDH*, *OsNAS1*, *OsNAS2*, and  
247 *OsDMAS1*) whose expression levels were upregulated by Fe deficiency were  
248 expressed at lower levels in the *fit-1* mutant compared with the wild-type  
249 control. Previous studies confirmed that *OsNAAT1* is a key enzyme for DMA  
250 synthesis in rice (Cheng et al., 2007; Inoue et al., 2008). Because of a lack of  
251 *OsNAAT1* probe in the GeneChip, we analyzed *OsNAAT1* expression via a  
252 qRT-PCR assay (Supplemental Figure S4C). The expression of *OsNAAT1* was  
253 downregulated in the *fit* mutants. Moreover, several Fe-uptake genes, such as  
254 *OsIRT1*, *OsENA1*, *OsENA2*, *OsTOM1*, *OsYSL15*, and *OsYSL16*, which were  
255 induced by Fe deficiency, exhibited downregulated expression in the *fit-1*  
256 mutants relative to the wild-type expression levels. Additionally, among the  
257 genes induced by Fe deficiency, *OsMIR*, *OsIMA1*, *OsNRAMP1*, *OsIRT2*,  
258 *OsIRO2*, and *OsIRO3* were more highly expressed in the *fit-1* mutant than in  
259 the wild-type control. These data suggest that the loss-of-function mutations to  
260 *OsFIT* disrupt the expression of genes associated with Fe homeostasis.

261

### 262 **Overexpression of *OsFIT* promotes Fe accumulation and expression of** 263 **Fe-uptake genes**

264

265 Considering that loss-of-function mutations to *OsFIT* resulted in increased  
266 sensitivity to Fe deficiency and decreased Fe accumulation, we examined  
267 whether upregulated *OsFIT* expression leads to enhanced tolerance to Fe  
268 deficiency and increased Fe accumulation. Thus, we generated

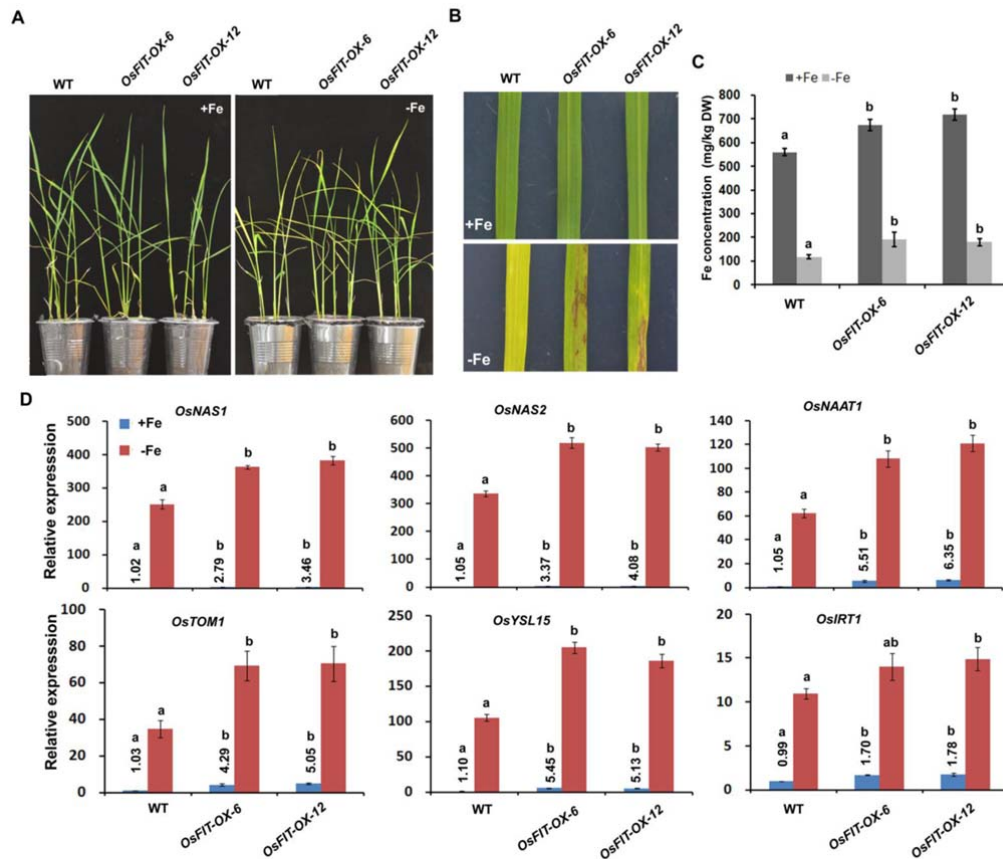

**Figure 5.** Analysis of *OsFIT* overexpression plants.

**(A)** Growth of *OsFIT* overexpression plants. For +Fe growth, four-day-old seedlings germinated on wet paper were shifted in +Fe solution for 19 days. For -Fe growth, four-day-old seedlings germinated on wet paper were shifted in +Fe solution for 1 day and transferred to -Fe for 18 days. **(B)** The third leaves of seedlings in (A). **(C)** Fe concentration of shoots grown in +Fe solution in (A). Data represent means  $\pm$  SD ( $n = 3$ ). Different letters above each bar indicate statistically significant differences as determined by one-way ANOVA followed by Tukey's multiple comparison test ( $P < 0.05$ ). **(D)** Expression of Fe uptake genes. Four-day-old seedlings germinated on wet paper were grown in +Fe for 5 days and then transferred to +Fe or -Fe for 5 days. Roots were used for RNA extraction. Data represent means  $\pm$  SD ( $n = 3$ ). Different letters above each bar indicate statistically significant differences as determined by one-way ANOVA followed by Tukey's multiple comparison test ( $P < 0.05$ ).

269 *OsFIT*-overexpressing plants, among which two independent transgenic plants  
 270 with high *OsFIT* expression levels were selected for subsequent analyses  
 271 (Supplemental Figure S5A). There were no obvious differences between the  
 272 *OsFIT*-overexpressing plants and the wild-type plants after a short-term (9  
 273 days) -Fe treatment (Supplemental Figure S5B). However, after a long-term  
 274 (18 days) exposure to Fe deficiency, the older leaves of the  
 275 *OsFIT*-overexpressing plants developed obvious rust spots, which were absent

276 in the wild-type plants (Figure 5A, B). A subsequent comparison of the metal  
277 concentrations revealed that the *OsFIT*-overexpressing plants accumulated  
278 significantly more Fe and Zn, but not Cu, than the wild-type plants under both  
279 +Fe and –Fe conditions (Figure 5C; Supplemental Figure S5C). The rust spots  
280 on the leaves might result from the elevated Fe and Zn accumulation in the  
281 *OsFIT* overexpression lines. Next, we examined the expression of some  
282 Fe-deficiency-responsive genes that were downregulated in the *fit-1* mutant.  
283 The expression levels of all of the examined genes (*OsNAS1*, *OsNAS2*,  
284 *OsNAAT1*, *OsTOM1*, *OsYSL15*, and *OsIRT1*) increased in the  
285 *OsFIT*-overexpressing plants (Figure 5D). Our data imply that *OsFIT* positively  
286 regulates the expression of Fe-uptake-associated genes and promotes Fe  
287 uptake in rice.

288

#### 289 **Genetic relationship between *OsFIT* and *OsIRO2***

290

291 Although we confirmed that *OsFIT* interacts with *OsIRO2* (Figure 1), it  
292 remained unclear how these two transcription factors regulate Fe homeostasis.  
293 We observed that the *OsIRO2* transcript levels increased in the *fit-1* mutant  
294 (Table 1), implying that *OsIRO2* expression is not positively regulated by *OsFIT*.  
295 To determine whether *OsFIT* is positively regulated by *OsIRO2*, we examined  
296 its expression in the *iro2-1* mutant (Zhang et al., 2019). Interestingly, the *OsFIT*  
297 transcript level increased in the *iro2-1* mutant (Supplemental Figure S6). To  
298 investigate the genetic relationship between *OsFIT* and *OsIRO2*, we  
299 generated the *fit-1 iro2-1* double mutant by crossing two single mutants. When  
300 grown in the +Fe solution, the single and double mutants were phenotypically  
301 similar to the wild-type control (Figure 6A). When grown in the –Fe solution,  
302 the single and double mutants, but not the wild-type control, developed  
303 chlorotic leaves; however, there were no observable differences between the  
304 single and double mutants. Moreover, the Fe concentration of the *fit-1 iro2-1*  
305 double mutant plants was as low as that of the single mutants *fit-1* and *iro2-1*

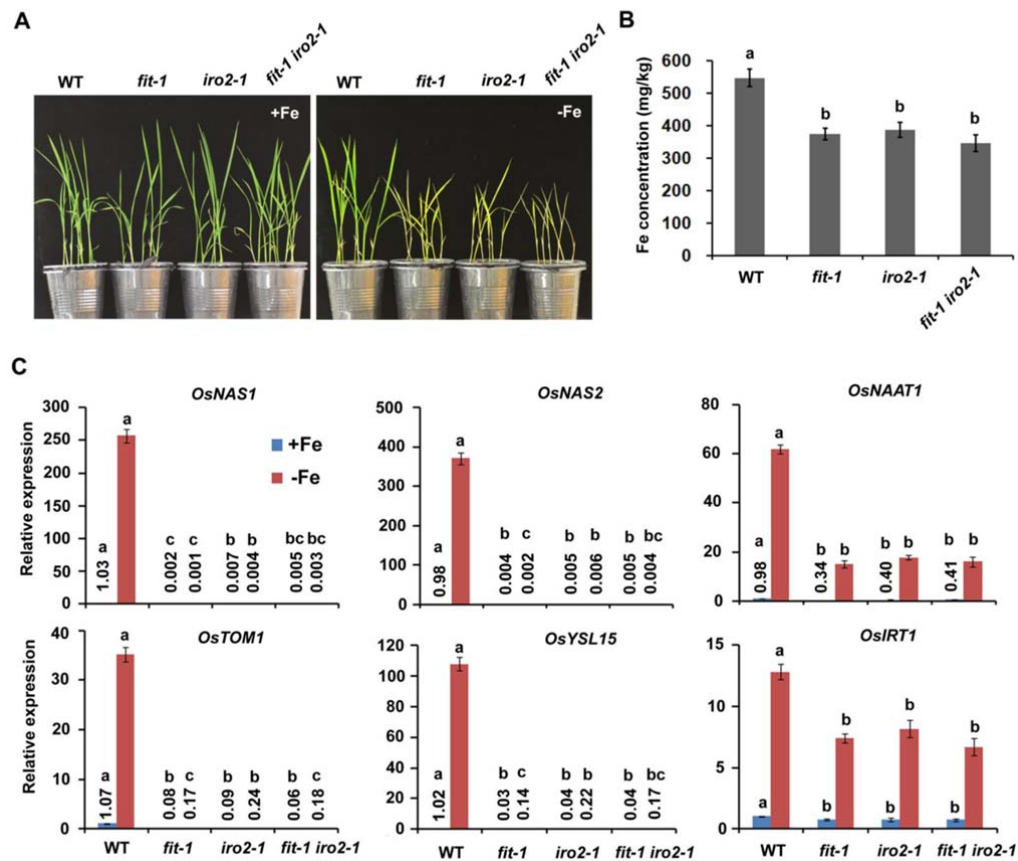

**Figure 6.** Genetic interaction between OsIRO2 and OsFIT.

(A) Growth of various mutant seedlings. Seeds were germinated on wet paper for four days. For +Fe growth, four-day-old seedlings germinated on wet paper were shifted in +Fe for 10 days. For -Fe growth, four-day-old seedlings germinated on wet paper were shifted in +Fe for 1 day and transferred to -Fe for 9 days. (B) Fe concentration of shoots grown in +Fe solution in (A). Data represent means  $\pm$  SD ( $n = 3$ ). Different letters above each bar indicate statistically significant differences as determined by one-way ANOVA followed by Tukey's multiple comparison test ( $P < 0.05$ ). (C) Expression of Fe uptake genes. Four-day-old seedlings were grown in +Fe for 5 days and transferred to +Fe or -Fe for 5 days. Roots were used for RNA extraction. Data represent means  $\pm$  SD ( $n = 3$ ). Different letters above each bar indicate statistically significant differences as determined by one-way ANOVA followed by Tukey's multiple comparison test ( $P < 0.05$ ).

306 (Figure 6B). We subsequently determined the expression of  
 307 Fe-deficiency-responsive genes in the wild-type plants as well as in the single  
 308 and double mutants (Figure 6C). The downstream Fe-uptake genes were  
 309 expressed at a similar level between the single and double mutants.  
 310 Collectively, our data suggest that OsIRO2 and OsFIT function in the same  
 311 node of the Fe homeostasis signaling network.

312

313 **OsFIT and OsIRO2 function as a transcription complex**



314

315 Although OsFIT and OsIRO2 interact with each other and positively regulate  
316 Fe homeostasis, the molecular mechanism underlied is unclear. Both OsFIT  
317 and OsIRO2 are bHLH transcription factors and they regulate the expression  
318 of numerous Fe deficiency responsive genes. We proposed that some of these  
319 genes are the direct targets of OsIRO2 and OsFIT. Generally, bHLH  
320 transcription factors regulate their targets by binding to the E-boxes within the  
321 promoters (Fisher and Goding, 1992). A sequence analysis revealed several  
322 E-boxes within the promoters of Fe-deficiency-responsive genes (*OsNAS1*,  
323 *OsNAS2*, *OsNAAT1*, *OsDMAS1*, *OsTOM1*, and *OsYSL15*) (Supplemental  
324 Figure S7A). To determine whether OsFIT and OsIRO2 bind to the E-boxes,  
325 we performed EMSAs with *OsNAS2* and *OsYSL15* promoter probes. The  
326 full-length *OsFIT* and *OsIRO2* were respectively fused with the glutathione  
327 S-transferase (GST) and the recombinant proteins GST-OsFIT and  
328 GST-OsIRO2 were expressed in and purified from *E. coli* cells. We observed  
329 that the biotin probe was able to bind to GST-OsIRO2, but not GST-OsFIT or  
330 GST alone (Figure 7A). The binding of GST-OsIRO2 by the biotin probe was  
331 inhibited by the addition of increasing amounts of the unlabeled probes (cold  
332 probe), but not the mutated probe (cold probe-m). These observations suggest  
333 that OsIRO2 can bind to the *OsNAS2* and *OsYSL15* promoters. Considering  
334 that OsFIT interacts with OsIRO2, we assessed whether OsFIT affects the  
335 binding of OsIRO2 to DNA. Specifically, both OsFIT and OsIRO2 were  
336 incubated with the probes. The presence of OsFIT appeared to enhance the  
337 binding of OsIRO2 to the probes.

338 We then examined the transactivation ability of OsIRO2 and OsFIT by the  
339 transient expression assay involving a LUC-based effector-reporter system in  
340 the wild-type rice protoplasts (Figure 7B). The *OsNAS2* and *OsYSL15*  
341 promoters were fused to the *LUC* gene as the reporters (*ProOsNAS2:LUC* and  
342 *ProOsYSL15:LUC*). The *Myc-OsIRO2* and *HA-OsFIT* under the control of the  
343 CaMV 35S promoter functioned as the effectors. When the effector

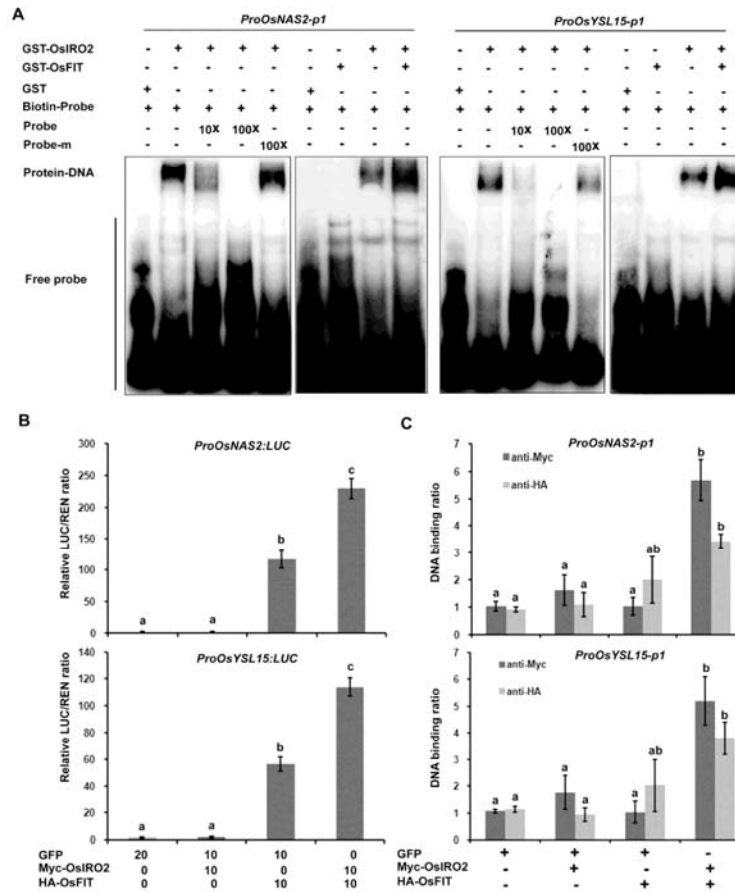

**Figure 7.** OsIRO2 and OsFIT mutually regulate the expression of *OsNAS2* and *OsYSL15*. **(A)** EMSA showing that OsIRO2 directly binds the *OsNAS2* and *OsYSL15* promoters. GST-OsIRO2 and/or OsFIT were incubated with the biotin-labeled probes. Biotin-probe, biotin-labeled probe; cold-probe, unlabeled probe; cold-probe-m, unlabeled mutated probe. Biotin probe incubated with GST served as the negative control. **(B)** Activation of target genes by OsIRO2 and OsFIT. The LUC/REN ratio represents the LUC activity relative to the internal control (REN driven by the 35S promoter). The numbers 0, 10 and 20 indicate that 0, 10, and 20  $\mu$ g of plasmid were used for the corresponding vectors in the transient expression assay. Data represent means  $\pm$  SD ( $n = 3$ ). Different letters above each bar indicate statistically significant differences as determined by one-way ANOVA followed by Tukey's multiple comparison test ( $P < 0.05$ ). **(C)** ChIP-qPCR analysis. The numbers in the parenthesis indicate the relative proportion of agrobacteria in each combination. Data represent means  $\pm$  SD ( $n = 3$ ). Different letters above each bar indicate statistically significant differences as determined by one-way ANOVA followed by Tukey's multiple comparison test ( $P < 0.05$ ).

344 *Myc-OsIRO2* was co-expressed with the reporters, the LUC activity did not  
 345 increase significantly. In contrast, the effector *HA-OsFIT* substantially  
 346 increased the LUC activity of both reporters. When both effectors were  
 347 expressed simultaneously, the LUC activity was higher than that induced by  
 348 the *HA-OsFIT* effector alone. These results suggest that OsFIT, but not  
 349 OsIRO2, activates the expression of their target genes.

350 To further investigate whether OsFIT and OsIRO2 functionally depend each  
351 other, Myc-OsIRO2 and the reporters were coexpressed in the *fit-1* protoplasts,  
352 and HA-OsFIT and the reporters in the *iro2-1* protoplasts. As a result, the LUC  
353 activity of reporters did not increase (Supplemental Figure S7B), suggesting  
354 that both OsIRO2 and OsFIT are required for the expression of their target  
355 genes.

356 Subsequently, we conducted ChIP-qPCR assays to investigate the binding  
357 of OsIRO2 and OsFIT to their target genes *in vivo*. When Myc-OsIRO2 or  
358 HA-OsFIT was expressed with the effectors, no significant binding to target  
359 sequences was detected. In contrast, when Myc-OsIRO2 and HA-OsFIT were  
360 co-expressed, they could bind to the promoters of *OsNAS2* and *OsYSL15*  
361 (Figure 7C). These results further suggest that OsFIT and OsIRO2 function as  
362 a transcription complex to regulate the expression of their target genes.

363

### 364 ***OsFIT* expression is positively regulated by OsPRI1, OsPRI2, and OsPRI3**

365

366 Although OsFIT and OsIRO2 positively regulate the expression of many  
367 Fe-deficiency-responsive genes, the transcription of *OsFIT* and *OsIRO2* is  
368 also induced by Fe deficiency. We previously revealed that OsPRI1, OsPRI2,  
369 and OsPRI3 directly activate *OsIRO2* expression (Zhang et al., 2017, 2019).  
370 Therefore, we evaluated whether *OsFIT* expression is also positively regulated  
371 by OsPRI1, OsPRI2, and OsPRI3. An analysis of *OsFIT* indicated that its  
372 expression levels decreased in the *pri1-1*, *pri2-1*, and *pri3-1* mutant plants and  
373 increased in the *OsPRI2*- and *OsPRI3*-overexpressing plants (Figure 8).  
374 These data suggest that OsPRI1, OsPRI2, and OsPRI3 stimulate *OsFIT*  
375 expression under Fe-deficient conditions.

376

377

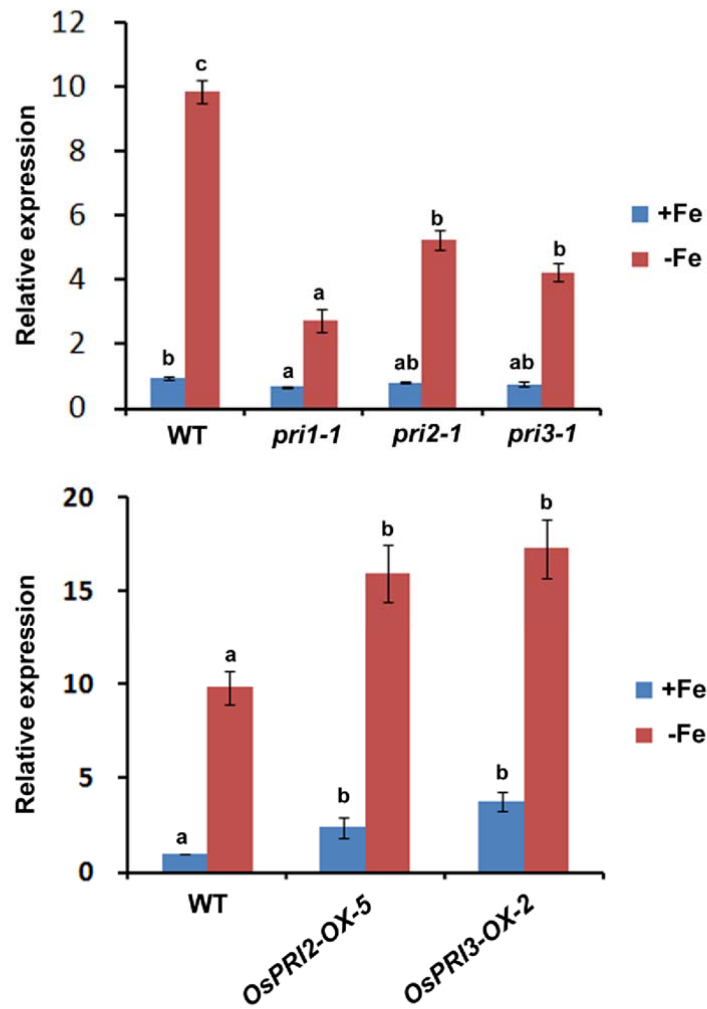

**Figure 8.** *OsFIT* is regulated positively by the OsPRI proteins.

Four-day-old seedlings germinated on wet paper were grown in +Fe for 5 days and transferred to +Fe or -Fe for 5 days. Roots were used for RNA extraction. Data represent means  $\pm$ SD ( $n = 3$ ). Different letters above each bar indicate statistically significant differences as determined by one-way ANOVA followed by Tukey's multiple comparison test ( $P < 0.05$ ).

## 378 DISCUSSION

379

380 In response to Fe deficiency, plants modify the expression of numerous genes  
381 to maintain Fe homeostasis. However, the signal transduction network  
382 regulating the expression of Fe-homeostasis-associated genes has not been  
383 comprehensively characterized. As a key component of the Fe homeostasis

384 signaling network, OsiRO2 positively regulates rice Fe homeostasis. Here, we  
385 identified and characterized its interaction partner OsFIT. When this  
386 manuscript was under review, Wang et al. (2020) reported the similar functions  
387 of OsFIT/OsbHLH156 in rice Fe homeostasis. In this study, we further revealed  
388 that OsFIT and OsiRO2 function in the same genetic node and form a  
389 transcription complex to regulate rice Fe homeostasis.

390

### 391 **Similarities and differences between OsFIT and AtFIT**

392

393 Earlier investigations proved that AtFIT interacts with Arabidopsis bHLH Ib TFs  
394 and positively regulates the strategy I system in Arabidopsis (Yuan et al., 2008;  
395 Wang et al., 2013). Another study indicated OsiRO2 is a rice ortholog of  
396 Arabidopsis bHLH Ib TFs (Ogo et al., 2007). Because of the functional  
397 redundancy among Arabidopsis bHLH Ib TFs, their single or double mutants  
398 have no visible Fe-deficiency symptoms and their triple mutants exhibit  
399 Fe-deficiency symptoms that are not as extensive as those of the *fit* mutant  
400 (Wang et al., 2013). In contrast, we observed that the Fe-deficiency symptoms  
401 of the single *iro2-1* mutant were as strong as those of the *fit* mutants (Figure  
402 6A, B). These results suggest that OsiRO2 is similar to Arabidopsis bHLH Ib  
403 TFs. Moreover, OsiRO2 may be the only rice ortholog of Arabidopsis bHLH Ib  
404 TFs. Similar to the interaction between AtFIT and bHLH Ib, OsFIT interacts  
405 with OsiRO2 and positively regulates the expression of Fe-uptake genes in  
406 rice (Table 1; Figure 5D, 6C). The expression of *AtFIT* is induced by Fe  
407 deficiency and is positively regulated by bHLH IVc TFs (Zhang et al., 2015; Li  
408 et al., 2016; Liang et al., 2015). Similarly, *OsFIT* expression is induced by Fe  
409 deficiency via OsPRI1, OsPRI2, and OsPRI3 (Figure 8), which are orthologs of  
410 Arabidopsis bHLH IVc. Furthermore, the OsFIT protein sequence is 33.68%  
411 similar to the AtFIT sequence (Supplemental Figure S1B). Given these  
412 similarities between OsFIT and AtFIT, we assume that OsFIT is a rice ortholog  
413 of AtFIT.

414 The following evidence indicates the differences of physiological functions  
415 of OsFIT and AtFIT: (1) *AtFIT* is specifically expressed in the roots, whereas  
416 *OsFIT* is expressed and functional in the roots and leaves (see discussion  
417 below); (2) *AtFIT* overexpression has no significant effect on the expression of  
418 its downstream genes *AtIRT1* and *AtFRO2* (Colangelo and Guerinot, 2004),  
419 but *OsFIT* overexpression activates its downstream Fe-uptake-associated  
420 genes (Figure 5D); and (3) AtFIT regulates strategy I in Arabidopsis, whereas  
421 OsFIT regulates both strategy I and II in rice (see discussion below).

422

### 423 **OsFIT is involved in both strategy I and II**

424

425 Rice plants possess the strategy II Fe-uptake system specific to graminaceous  
426 plants, but also a partial strategy I Fe-uptake system, which is advantageous  
427 for growth in submerged conditions. Ishimaru et al. (2006) confirmed that rice  
428 takes up both Fe(III)-phytosiderophore and Fe(II). The results of a recent study  
429 suggest that rice uses strategy II to absorb Fe under Fe-deficient conditions,  
430 whereas strategy I is applied under Fe-sufficient conditions (Liu et al., 2019).

431 Rice strategy II-associated genes include *OsNAS1*, *OsNAS2*, *OsDMAS1*,  
432 *OsNAAT1*, *OsTOM1*, and *OsYSL15*. The expression levels of all of the  
433 analyzed strategy II-associated genes were considerably downregulated in the  
434 *fit* mutants (Table 1; Figure 6C), suggesting the strategy II Fe-uptake system  
435 was impaired. Correspondingly, the Fe concentration was lower in the *fit*  
436 mutants than in the wild-type control when Fe(III) was the only Fe source  
437 (Figure 3E). These data suggest that OsFIT is a crucial regulator of the  
438 strategy II Fe-uptake system.

439 It is unclear which genes are responsible for the strategy I system in rice. In  
440 Arabidopsis, AtIRT1 is a key component of strategy I. Although the AtIRT2 and  
441 AtIRT1 amino acid sequences are similar, AtIRT2 cannot rescue the  
442 phenotypes caused by loss-of-function mutations to *AtIRT1*. Unlike AtIRT1  
443 which is a plasma-membrane protein (Vert et al., 2002), AtIRT2 is localized to

444 intracellular vesicles, and hence may be responsible for compartmentalization  
445 of iron (Vert et al., 2009). A previous study revealed a lack of significant  
446 differences between the loss-of-function *irt2-1* mutant and the wild-type plants  
447 (Varotto et al., 2002), implying that AtIRT2 is not a key component of the  
448 strategy I system. Rice contains OsIRT1 and OsIRT2, which are the  
449 counterparts of AtIRT1 and AtIRT2, respectively. However, unlike AtIRT2,  
450 OsIRT2 is a plasma-membrane protein (Ishimaru et al., 2006). Thus, it is still  
451 unclear which one of OsIRT1 and OsIRT2 is responsible for the uptake of Fe(II)  
452 in rice. In the current study, *OsIRT1* expression was downregulated in the *fit*  
453 mutants (Table 1; Figure 6C), implying that OsFIT positively regulates *OsIRT1*  
454 expression. In contrast, *OsIRT2* was upregulated in the *fit-1* mutant (Table 1).  
455 Similarly, *AtIRT1* is also downregulated in the Arabidopsis *fit* mutant  
456 (Colangelo and Guerinot, 2004). Thus, it is very likely that OsIRT1 functions in  
457 the translocation of Fe(II) from soil to roots. Rhizosphere acidification mediated  
458 by plasma membrane H<sup>+</sup>-ATPases is a key step in the strategy I Fe-uptake  
459 system. The expression of *OsHA1* (Os05g0319800), which encodes a plasma  
460 membrane H<sup>+</sup>-ATPase, is induced in response to Fe deficiency, indicating that  
461 *OsHA1* may be a component of the rice strategy I Fe-uptake system. The  
462 transcription of *OsHA1* decreased significantly in the *fit-1* mutant (Table 1),  
463 suggesting *OsHA1* expression is positively regulated by OsFIT.

464 An earlier study on the *naat1* mutant indicates that the strategy I system is  
465 necessary for rice homeostasis (Cheng et al., 2007). The *naat1* mutant, in  
466 which the strategy II system is damaged, cannot survive a nutrient solution  
467 with Fe(III) as the only Fe source. Additionally, this mutant activates the  
468 strategy I system and accumulates more Fe than the wild-type control in the  
469 Fe(II) solution. However, the *fit* mutants with a severely inhibited strategy II  
470 system did not activate strategy I. In fact, less Fe accumulated in the *fit*  
471 mutants than in the wild-type plants when grown in the Fe(II) solution (Figure  
472 3E), implying the strategy I system was slightly inhibited. Therefore, we  
473 propose that OsFIT regulates both strategy I and II.

474

## 475 **The OsFIT-OsIRO2 complex regulates Fe homeostasis**

476

477 The *OsIRO2* gene is expressed in the root and leaf vascular tissues under  
478 Fe-sufficient conditions, but its expression can extend to all root and leaf  
479 tissues under Fe-deficient conditions (Ogo et al., 2011). In addition to  
480 controlling the Fe-uptake genes in the roots, OsFIT also mediates the  
481 expression of some Fe-uptake genes in the shoots. The expression levels of  
482 several Fe-uptake genes, such as *OsNAS1/2*, *OsYSL15*, *OsENA1*, *OsTOM1*,  
483 and *OsZIFL9*, which are upregulated in wild-type shoots under Fe-deficient  
484 conditions (Table 1), are downregulated in the *fit-1* shoots, indicating OsFIT is  
485 functional in the shoots. The induction of *OsNAS1* and *OsNAS2* expression is  
486 completely blocked in the *fit-1* roots, but not in the *fit-1* shoots. It is likely that  
487 other transcription factors are also involved in the activation of *OsNAS1* and  
488 *OsNAS2* expression in the shoots.

489 Although rice and Arabidopsis evolved different Fe-uptake strategies, the  
490 expression of Fe-uptake genes in both species is controlled by a very similar  
491 regulatory network. In Arabidopsis, AtFIT and bHLH 1b TFs function  
492 downstream of bHLH IVc TFs (Zhang et al., 2015; Li et al., 2016; Liang et al.,  
493 2017). Similarly, *OsFIT* and *OsIRO2* expression levels are positively regulated  
494 by OsPRI1, OsPRI2, and OsPRI3 (Figure 8). Although *OsFIT* transcript levels  
495 were elevated in the *iro2-1* mutants (Supplemental Figure S6), these mutants  
496 still exhibited Fe-deficiency symptoms. Similarly, *OsIRO2* was also highly  
497 expressed in the *fit-1* mutant (Table 1). These observations suggest that the  
498 elevated *OsFIT* is not sufficient to rescue the loss-of-function of *OsIRO2*, and  
499 vice versa. Meanwhile, the deficiency symptoms and the expression of  
500 Fe-uptake genes in the *fit-1 iro2-1* double mutants were similar to those of the  
501 single mutants *fit-1* and *iro2-1*, implying that OsFIT and *OsIRO2* function in the  
502 same genetic node (Figure 6).

503 Our results indicate that OsFIT physically interacts with *OsIRO2* (Figure 1).



504 OsIRO2 is preferentially expressed in the cytoplasm, and the upregulated  
505 expression of OsFIT results in the increased nuclear accumulation of OsIRO2  
506 (Figure 2C). A similar result was also reported by Wang et al. (2020). A latest  
507 study found that AtFIT promotes the nuclear accumulation of AtbHLH39, an  
508 Arabidopsis homolog of OsIRO2, in Arabidopsis (Trofimov et al., 2019).  
509 Similarly, Arabidopsis bHLH IVc TFs promote the nuclear accumulation of  
510 AtbHLH121 which is required for the maintenance of Arabidopsis Fe  
511 homeostasis (Kim et al., 2019; Gao et al., 2020; Lei et al., 2020). Although we  
512 did not observe the localization change of OsIRO2 in response to Fe  
513 deficiency in our transient expression assays, the increased nuclear  
514 accumulation of OsIRO2 under Fe deficiency condition was observed by Wang  
515 et al. (2020). Further investigations are required to reveal the biological  
516 relevance of OsIRO2 localization change with the Fe deficiency response.

517 Although OsIRO2 binds to the target promoters and OsFIT may enhance its  
518 binding activity (Figure 7A), OsIRO2 alone could not activate the expression of  
519 the target genes (Figure 7B). Therefore, OsIRO2 may lack a transcription  
520 activation ability. In contrast, OsFIT did not bind to the promoters of *OsNAS2*  
521 and *OsYSL15* in our EMSA, but OsFIT activates the latter (Figure 7A, B). It is  
522 plausible that OsFIT lacks a DNA binding ability. It is noteworthy that OsIRO2  
523 binds to its target promoters *in vivo* only in the presence of OsFIT (Figure 7C),  
524 agreeing with that OsFIT promotes the accumulation of OsIRO2 in the nucleus  
525 where it binds to the target DNA. Meanwhile, it is also noted that the activation  
526 of the *OsNAS2* and *OsYSL15* promoters by OsFIT occurs in the wild-type  
527 (Figure 7B), but not in the *iro2-1* mutant (Supplemental Figure S7B), implying  
528 that the function of OsFIT may depend on the DNA binding ability of OsIRO2.  
529 Therefore, we propose that both OsFIT and OsIRO2 are required for the  
530 expression of their downstream genes; and they interact with each other to  
531 form a functional transcription complex to regulate Fe-uptake associated  
532 genes.

533

## 534 **A working model of OsFIT and OsIRO2**

535

536 OsHRZ1 is a putative Fe-binding sensor which negatively regulates Fe  
537 homeostasis in rice (Kobayashi et al., 2013). Our recent work revealed that  
538 OsHRZ1 interacts with and degrades OsPRI1, OsPRI2 and OsPRI3 which  
539 directly activate the expression of *OsIRO2* and *OsIRO3* (Zhang et al., 2017,  
540 2019). OsIRO2 positively and OsIRO3 negatively regulate Fe homeostasis  
541 respectively (Ogo et al., 2007; Zheng et al., 2010). Here, we further revealed  
542 that *OsFIT* is positively regulated by OsPRI1/2/3, and OsFIT and OsIRO2 form  
543 a transcription complex to regulate Fe homeostasis. A working model of  
544 OsIRO2 and OsFIT was developed (Figure 9). Specifically, when plants are  
545 exposed to Fe-deficient conditions, OsPRI1, OsPRI2 and OsPRI3 activate the  
546 expression of *OsIRO2* and *OsFIT*. Under Fe sufficient conditions, OsIRO2 is  
547 preferentially located in the cytoplasm. Under Fe deficient conditions, OsFIT  
548 promotes the accumulation of OsIRO2 in the nucleus, and then OsIRO2 and  
549 OsFIT form a functional transcription complex to activate the expression of  
550 Fe-uptake genes.

551

## 552 **MATERIALS AND METHODS**

553

### 554 **Plant materials and growth conditions**

555 Rice (*Oryza sativa* L. cv. Nipponbare) seeds were germinated in wet paper for  
556 five days and moved to hydroponic culture or soils. For hydroponic culture  
557 assays, half-strength Murashige and Skoog (MS) media (pH5.6-5.8) with 0.1  
558 mM Fe(III)-EDTA or 0.1 mM Fe(II)-EDTA or without Fe. For Fe(II) solution, 0.1  
559 mM hydroxylamine was supplemented to avoid the oxidation of Fe(II). The  
560 nutrient solution was exchanged every 3 days. For soil assays, plants were  
561 grown in waterlogged or aerobic soil. The plants were watered with tap water.  
562 Plants were grown in a growth chamber at 28°C/20°C (day/night) and 60 % to  
563 70 % humidity, bulb type light with a photon density of  $\sim 300 \mu\text{mol m}^{-2} \text{s}^{-1}$  and a

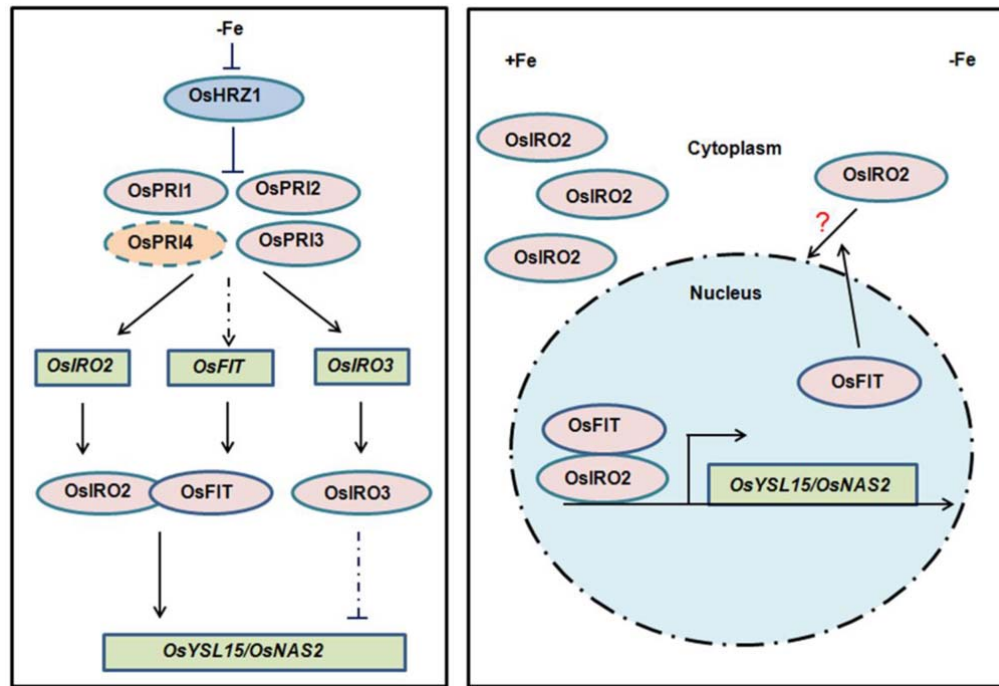

**Figure 9.** A proposed working model of OsFIT and OsIRO2.

Fe deficiency response pathways in rice. OsHRZ1 interacts with and inhibits OsPRI1, OsPRI2 and OsPRI3 which activate the expression of *OsIRO2*, *OsFIT* and *OsIRO3*. OsPRI4, a paralog of OsPRI1, OsPRI2 and OsPRI3, may play a redundant role in Fe homeostasis. OsIRO2 and OsFIT form a heterodimer to initiate the expression of their downstream target genes. OsIRO3 negatively regulates the expression of Fe deficiency responsive genes. OsIRO2 is preferentially expressed in the cytoplasm. OsFIT is specifically expressed in the nucleus. OsFIT facilitates the nuclear accumulation of OsIRO2 in the nucleus. OsFIT and OsIRO2 function as a transcription complex to control the expression of Fe-uptake genes.

564 photoperiod of 14 h.

565

### 566 **Gene expression analysis**

567 Total RNA from rice roots or shoots was reverse transcribed using an oligo dT  
568 and HiScript II Q RT SuperMix for qPCR (+gDNA wiper) (Vazyme, China)  
569 following the manufacturer's protocol. qPCR was performed on a Light-Cycler  
570 480 real-time PCR machine (Roche, Switzerland) by the use of an AceQ  
571 Universal SYBR qPCR Master Mix (Vazyme, China). All PCR amplifications  
572 were performed in triplicate, with the *OsACTIN1* gene as an internal control.

573 Primers used for qPCR are listed in Supplemental Table S2.

574

### 575 **Fe measurement**

576 The harvested plants were rinsed with distilled water and then blotted using  
577 paper towels. The shoots were then separated and dried at 65 °C for one week.  
578 For each sample, about 500 mg dry weight of shoots were digested with 5 ml  
579 of 11 M HNO<sub>3</sub> and 2 ml of 12 M HClO<sub>4</sub> for 30min at 220°C. Metal  
580 concentrations were measured using Inductively Coupled Plasma Mass  
581 Spectrometry (ICP-MS).

582

### 583 **Yeast two-hybrid assays**

584 The yeast two-hybrid assays were carried out according to the manufacturer's  
585 protocol. The OsIRO2 N-terminal fragment (aa 1-150) was subcloned to the  
586 pGBKT7 plasmid as bait. Yeast transformation was performed according to the  
587 Yeastmaker Yeast Transformation System 2 User Manual (Clontech). More  
588 than 1 x 10<sup>6</sup> yeast clones were screened in synthetic defined (SD) medium  
589 minus Trp, Leu, His, and Ade. The plasmids of the positive clones were  
590 extracted and then retransformed into yeast for the double check on selective  
591 SD plates. Positive clones were selected for sequencing.

592 In yeast two-hybrid assays, the full-length OsFIT was subcloned to  
593 pGADT7 and then co-transformed with pGBKT7-OsIRO2-N. Yeast  
594 transformation was performed according to the Yeastmaker Yeast  
595 Transformation System 2 User Manual (Clontech). The primers used are  
596 listed in Supplemental Table S2.

597

### 598 **Generation of Plasmids Used for Transgenic Plants**

599 To ensure the gene targeting efficiency and avoid off-targets, target sites were  
600 designed by the use of CRISPR-GE (Xie et al., 2017). The editing vectors were  
601 constructed as described previously (Liang et al., 2016). Briefly, the OsU6a  
602 promoter driving the sgRNA containing a single target site was cloned into the

603 pMH-SA vector by the restriction enzyme sites *SpeI* and *AscI* (Liang et al.,  
604 2016).

605 For the construction of overexpression vector, the HA-OsFIT fusion  
606 sequence was obtained from the GAD-OsFIT vector and cloned between the  
607 maize ubiquitin promoter and the NOS terminator in the pUN1301 binary  
608 vector.

609 For the construction of *ProOsFIT:GUS* vector, the 3.2kb sequence upstream  
610 of *OsFIT* was subcloned into pCAMBIA1300-GUS plasmid with the *Sac I* site  
611 by a modified Gibson Assembly method (Zhu et al., 2014). Histochemical GUS  
612 staining assays were performed by the use of GUS histochemical assays kit  
613 (Real-Times, China) following the manufacturer's protocol.

614

#### 615 **Tripartite split-GFP assays**

616 *Agrobacterium tumefaciens* strain EHA105 was used in the transient  
617 expression experiments. The sfGFP was divided into three parts, GFP1-9,  
618 GFP10 and GFP11, as described previously (Liu et al., 2018) and then they  
619 were subcloned into the pER8 vector to generate pTG1-9, pTG10 and pTG11  
620 respectively. The pTG10 plasmid was linearized by the *Xho I* and fused in  
621 frame with OsIRO2 by a modified Gibson Assembly method (Zhu et al., 2014).  
622 Similarly, the pTG11 plasmid was linearized by the *Xho I* and fused in frame  
623 with OsFIT. *Agrobacteria* were incubated in LB liquid media. When growth  
624 reached an OD600 of approximately 3.0, the bacteria were spun down gently  
625 (3200 g, 5 min), and the pellets were resuspended in infiltration buffer (10 mM  
626 MgCl<sub>2</sub>, 10 mM MES, pH 5.6) at a final OD600 of 1.5. A final concentration of  
627 0.2 mM acetosyringone was added, and the bacteria were kept at room  
628 temperature for at least 2 h without shaking. For coinfiltration, the combination  
629 of different constructs as indicated in Figure 1B were mixed prior to infiltration.  
630 Leaf infiltration was conducted in 3-week-old *Nicotiana benthamiana*. The  
631 abaxial sides of leaves were injected with 20 μM β-estradiol 24 h before  
632 observation.

633

### 634 **Co-IP Assays**

635 *Agrobacterium* strain EH105 cells carrying the *Pro35S:HA-GFP*,  
636 *Pro35S:Myc-OsIRO2*, or *Pro35S:HA-OsFIT* constructs were combined as  
637 indicated and transiently infiltrated into *N. benthamiana* leaves. The plants were  
638 grown in dark for 2 d and lysed. The extracts were incubated with 5  $\mu$ L anti-HA  
639 antibodies coupled with 30  $\mu$ L Protein-A Sepharose (GE Healthcare) overnight  
640 at 4 °C. The Sepharose was washed three times with protein extraction buffer.  
641 The samples were analyzed by immunoblotting using an anti-Myc antibody.

642

### 643 **Subcellular Localization**

644 The full-length OsFIT was fused with GFP to generate OsFIT-GFP and the  
645 full-length OsIRO2 with mCherry to generate OsIRO2-mCherry. The plasmids  
646 above were transformed into agrobacteria. Agrobacteria were incubated in LB  
647 liquid media. When growth reached an OD600 of approximately 3.0, the  
648 bacteria were spun down gently (3200 g, 5 min), and the pellets were  
649 resuspended in infiltration buffer (10 mM MgCl<sub>2</sub>, 10 mM MES, pH 5.6) at a final  
650 OD600 of 1.0. Agrobacteria were mixed at a ratio indicated in Figure 2C and a  
651 final concentration of 0.2 mM acetosyringone was added. The agrobacteria  
652 were kept at room temperature for at least 2 h without shaking. Leaf infiltration  
653 was conducted in 3-week-old *N. benthamiana*. Excitation laser wave lengths of  
654 488 nm and 563 nm were used for imaging GFP and mCherry signals,  
655 respectively. Total intensities of the nucleus and the cytoplasm fluorescence  
656 were measured separately by Image J. The ratio was calculated for each  
657 individual cell.

658

### 659 **Transient Luciferase Expression Assay**

660 GFP, Myc-OsIRO2 and HA-OsFIT were subcloned to pGreenII 62SK as the  
661 effectors, and the *OsNAS2* and *OsYSL15* promoters were subcloned  
662 respectively to pGreen0800-LUC as the reporters (*ProOsNAS2:LUC* and

663 *ProOsYSL15:LUC*).

664 Rice mesophyll cell protoplasts were prepared as described previously  
665 (Zhang et al., 2011). Green tissues from the stem and sheath of ten-day-old  
666 seedlings grown on half MS medium were used. A bundle of rice plants (about  
667 30 seedlings) were cut together into approximately 0.5 mm strips using a sharp  
668 razor. The strips were immediately transferred into 0.6 M mannitol for 10 min in  
669 the dark. After discarding the mannitol, the strips were incubated in an enzyme  
670 solution (1.5% Cellulase RS, 0.75% Macerozyme R-10, 0.6 M mannitol, 10  
671 mM MES at pH 5.7, 10 mM CaCl<sub>2</sub> and 0.1% BSA) for 4-5 h in the dark with  
672 gentle shaking (60-80rpm). After the enzymatic digestion, an equal volume of  
673 W5 solution (154 mM NaCl, 125 mM CaCl<sub>2</sub>, 5mM KCl and 2 mM MES at pH  
674 5.7) was added, followed by vigorous shaking by hand for 10 sec. Protoplasts  
675 were released by filtering through 40 nylon meshes into round bottom tubes  
676 with 3-5 times wash of the strips using W5 solution. The pellets were collected  
677 by centrifugation at 1,500 rpm for 3 min with a swinging bucket. After washing  
678 once with W5 solution, the pellets were then resuspended in MMG solution  
679 (0.4 M mannitol, 15 mM MgCl<sub>2</sub> and 4 mM MES at pH 5.7) at a concentration of  
680  $2 \times 10^6$  cells mL<sup>-1</sup>.

681 In transient luciferase expression assay, plasmids were transfected into  
682 protoplasts as described previously (Yoo et al., 2007). A Dual Luciferase kit  
683 (Promega) was used to detect reporter activity. The *Renilla luciferase* gene  
684 driven by the 35S promoter was used as an internal control.

685

### 686 **Chromatin Immunoprecipitation (ChIP) assays**

687 The effector plasmids (pGreenII 62SK-GFP, pGreenII 62SK-Myc-OsIRO2, and  
688 pGreenII 62SK-HA-OsFIT) and the promoter plasmids (*ProOsNAS2:LUC* and  
689 *ProOsYSL15:LUC*) were transformed into agrobacteria with the pSOUP vector.  
690 The positive clones were selected on LB media with 25 µg/mL kanamycin and  
691 10 µg/mL tetracycline. Agrobacteria were resuspended in infiltration buffer (10  
692 mM MgCl<sub>2</sub>, 10 mM MES, pH 5.6) at a final OD600 of 1. Agrobacteria with the

693 corresponding plasmids were mixed at a ratio (effector1 : effector2 : reporter1 :  
694 reporter2=1 : 1 : 0.5 :0.5) and a final concentration of 0.2 mM acetosyringone  
695 was added. The agrobacteria were kept at room temperature for at least 2 h  
696 without shaking. Leaf infiltration was conducted in 3-week-old *N. benthamiana*.

697 The whole leaves infiltrated were used for ChIP assays. ChIP assays  
698 were conducted essentially according to previously described protocols  
699 (Saleh et al., 2008). ChIP assays were performed by anti-Myc antibody and  
700 anti-HA antibody respectively. To quantify OsFIT-DNA or OsIRO2-DNA  
701 binding ratio, qPCR was performed. The primers used for ChIP-qPCR are  
702 listed in Supplementary Table S2. For the quantification of each DNA  
703 fragment, three biological replicates were used. Each biological replicate  
704 contained three technical replicates.

705

#### 706 **EMSA**

707 EMSA was performed using a Chemiluminescent EMSA Kit (Beyotime). The  
708 recombinant GST-OsIRO2 and GST-OsFIT proteins were expressed in and  
709 purified from *E. coli*. Two complementary single-stranded DNA probes were  
710 synthesized and labeled by biotin at the 5' terminus. Biotin-unlabeled  
711 fragments of the same sequences or mutated sequences were used as  
712 competitors, and the GST protein alone was used as the negative control. The  
713 sequences of the probes are shown in Supplemental Table S2.

714

#### 715 **Immunoblotting**

716 Protein samples were separated on a 12% SDS-PAGE and transferred to a  
717 nitrocellulose membrane. Target proteins on the membrane were detected  
718 using immunodetection and chemiluminescence. Signals on the membrane  
719 were recorded using a chemiluminescence detection machine (Tanon-5200).  
720 The antibodies used for western blot are as follows, mouse monoclonal  
721 anti-HA (Affinity Biosciences, Cat#T0050), mouse monoclonal anti-Myc  
722 (ABclonal, Cat#AE010), and goat anti-mouse IgG horseradish peroxidase



723 (Affinity Biosciences, Cat#S0002).

#### 724 **Agilent GeneChip Analysis**

725 Four-day-old seedlings germinated in wet paper were transferred to solution  
726 culture with 0.1 mM Fe(III)-EDTA for five days. Then seedlings were  
727 transferred to solution culture without Fe or with 0.1 mM Fe(III)-EDTA for five  
728 days. Roots and shoots were separated and used for RNA extraction.  
729 GeneChip analysis was conducted by OE Biotech. Co. Ltd. (Shanghai).

730

#### 731 **ACKNOWLEDGMENTS**

732 We thank the Biogeochemical Laboratory and Central Laboratory  
733 (Xishuangbanna Tropical Botanical Garden) for assistance in the  
734 determination of metal contents. This work was supported by the Applied Basic  
735 Research Project of Yunnan Province (2017FB026) and the CAS 135 program  
736 (2017XTBG-T02).

737

#### 738 **SUPPLEMENTAL DATA**

739 **Supplemental Figure S1.** Self-activation of full-length OsIRO2 in yeast and  
740 similarity of AtFIT and OsFIT.

741 **Supplemental Figure S2.** Analysis of *ProOsFIT:GUS* lines.

742 **Supplemental Figure S3.** Generation and analysis of CRISPR/Cas9 edited  
743 mutants.

744 **Supplemental Figure S4.** OsFIT1 transcriptional regulation of Fe  
745 homeostasis genes.

746 **Supplemental Figure S5.** Analysis of *OsFIT* overexpression plants.

747 **Supplemental Figure S6.** Expression of *OsFIT* in the *iro2-1* mutant.

748 **Supplemental Figure S7.** Both OsIRO2 and OsFIT are required to regulate  
749 their targets.

750 **Supplemental Table S1.** Candidates interacting with OsIRO2 in yeast.

751 **Supplemental Table S2.** Primers used in this paper.

752

**Table 1.** Representative Fe deficiency responsive genes affected by OsFIT.

| ID                   | Root      |           |                     |                     | Shoot     |           |                     |                     | WT              | <i>fit-1</i>    | WT               | <i>fit-1</i>     | Annotation     |
|----------------------|-----------|-----------|---------------------|---------------------|-----------|-----------|---------------------|---------------------|-----------------|-----------------|------------------|------------------|----------------|
|                      | WT<br>+Fe | WT<br>-Fe | <i>fit-1</i><br>+Fe | <i>fit-1</i><br>-Fe | WT<br>+Fe | WT<br>-Fe | <i>fit-1</i><br>+Fe | <i>fit-1</i><br>-Fe | Root<br>-Fe/+Fe | Root<br>-Fe/+Fe | Shoot<br>-Fe/+Fe | Shoot<br>-Fe/+Fe |                |
| <b>Strategy I</b>    |           |           |                     |                     |           |           |                     |                     |                 |                 |                  |                  |                |
| Os03g0667500         | 11.79     | 14.90     | 11.32               | 13.10               | 8.56      | 8.88      | 8.57                | 8.66                | 3.12            | 1.78            | 0.32             | 0.09             | <i>OsIRT1</i>  |
| Os05g0319800         | 2.09      | 5.97      | 2.08                | 2.04                | 2.08      | 2.09      | 5.27                | 2.26                | 3.88            | -0.04           | 0.01             | -3.02            | <i>OsHA1</i>   |
| <b>Strategy II</b>   |           |           |                     |                     |           |           |                     |                     |                 |                 |                  |                  |                |
| Os04g0542200         | 10.19     | 12.05     | 11.05               | 10.52               | 10.66     | 9.99      | 10.81               | 9.74                | 1.85            | -0.53           | -0.67            | -1.07            | <i>OsYSL9</i>  |
| Os02g0650300         | 10.71     | 16.07     | 4.72                | 7.58                | 4.38      | 7.60      | 3.39                | 1.87                | 5.36            | 2.86            | 3.22             | -1.53            | <i>OsYSL15</i> |
| Os04g0542800         | 12.49     | 14.38     | 13.71               | 13.89               | 13.17     | 13.01     | 12.83               | 12.47               | 1.89            | 0.18            | -0.16            | -0.36            | <i>OsYSL16</i> |
| Os11g0134900         | 8.24      | 12.69     | 1.87                | 2.26                | 1.88      | 3.86      | 1.90                | 1.89                | 4.46            | 0.39            | 1.98             | -0.01            | <i>OsTOM1</i>  |
| Os11g0151500         | 6.80      | 10.34     | 4.49                | 4.58                | 2.12      | 4.51      | 2.10                | 2.37                | 3.54            | 0.09            | 2.39             | 0.27             | <i>OsENA1</i>  |
| Os12g0132500         | 9.85      | 14.54     | 4.68                | 4.70                | 3.49      | 6.62      | 3.63                | 3.49                | 4.69            | 0.02            | 3.13             | -0.14            | <i>OsZIFL9</i> |
| <b>DMA synthesis</b> |           |           |                     |                     |           |           |                     |                     |                 |                 |                  |                  |                |
| Os06g0112200         | 11.72     | 13.40     | 11.73               | 11.69               | 11.23     | 11.32     | 11.14               | 11.10               | 1.68            | -0.04           | 0.09             | -0.04            | <i>OsMTN</i>   |
| Os12g0589100         | 13.81     | 15.47     | 13.80               | 13.88               | 13.57     | 13.79     | 13.49               | 13.63               | 1.66            | 0.08            | 0.22             | 0.14             | <i>OsAPT1</i>  |
| Os04g0669800         | 12.45     | 14.18     | 12.23               | 12.55               | 12.31     | 12.61     | 12.30               | 12.34               | 1.74            | 0.31            | 0.31             | 0.05             | <i>OsMTK1</i>  |
| Os11g0216900         | 9.91      | 12.11     | 9.68                | 10.23               | 11.61     | 11.63     | 11.47               | 11.56               | 2.20            | 0.55            | 0.02             | 0.09             | <i>OsIDI2</i>  |
| Os11g0484000         | 12.62     | 15.46     | 12.19               | 12.49               | 13.21     | 13.26     | 13.05               | 13.27               | 2.83            | 0.29            | 0.05             | 0.21             | <i>OsDEP</i>   |
| Os03g0161800         | 12.41     | 13.88     | 12.30               | 12.26               | 12.95     | 12.98     | 12.71               | 12.81               | 1.47            | -0.05           | 0.03             | 0.09             | <i>OsIDI1</i>  |
| Os06g0486800         | 12.03     | 14.02     | 11.26               | 11.40               | 13.49     | 13.78     | 12.98               | 13.21               | 1.98            | 0.15            | 0.29             | 0.23             | <i>OsFDH</i>   |
| Os09g0453800         | 13.64     | 16.06     | 13.05               | 13.19               | 13.89     | 13.92     | 13.90               | 13.98               | 2.41            | 0.14            | 0.03             | 0.08             | <i>OsIDI4</i>  |
| Os03g0307300         | 14.01     | 18.21     | 2.60                | 2.77                | 5.07      | 13.62     | 4.43                | 7.67                | 4.20            | 0.17            | 8.55             | 3.24             | <i>OsNAS1</i>  |
| Os03g0307200         | 15.54     | 18.52     | 4.15                | 3.93                | 4.76      | 14.23     | 3.25                | 10.36               | 2.98            | -0.22           | 9.47             | 7.11             | <i>OsNAS2</i>  |

|                                             |       |       |      |       |       |       |      |       |      |       |      |       |                 |
|---------------------------------------------|-------|-------|------|-------|-------|-------|------|-------|------|-------|------|-------|-----------------|
| Os03g0237100                                | 9.78  | 13.72 | 8.83 | 8.52  | 8.99  | 9.65  | 8.33 | 8.27  | 3.94 | -0.31 | 0.66 | -0.06 | <i>OsDMAS1</i>  |
| <b>Other Fe deficiency responsive genes</b> |       |       |      |       |       |       |      |       |      |       |      |       |                 |
| Os01g0952800                                | 5.37  | 10.92 | 5.30 | 12.10 | 4.20  | 10.32 | 2.18 | 12.66 | 5.56 | 6.79  | 6.13 | 10.48 | <i>OsIRO2</i>   |
| Os03g0379300                                | 8.67  | 12.28 | 8.90 | 13.27 | 8.45  | 11.73 | 8.24 | 13.43 | 3.62 | 4.36  | 3.28 | 5.19  | <i>OsIRO3</i>   |
| Os12g0282000                                | 4.96  | 12.16 | 6.28 | 13.77 | 2.45  | 11.08 | 1.96 | 13.70 | 7.20 | 7.49  | 8.63 | 11.74 | <i>OsMIR</i>    |
| Os01g0647200                                | 10.59 | 15.10 | 9.77 | 16.59 | 12.48 | 17.63 | 8.14 | 18.48 | 4.51 | 6.82  | 5.16 | 10.34 | <i>OsIMA1</i>   |
| Os03g0667300                                | 6.55  | 11.25 | 7.39 | 13.25 | 5.15  | 9.21  | 6.02 | 11.63 | 4.71 | 5.86  | 4.06 | 5.61  | <i>OsIRT2</i>   |
| Os02g0649900                                | 2.75  | 8.74  | 2.10 | 8.10  | 2.11  | 7.71  | 5.48 | 8.42  | 5.99 | 5.99  | 5.60 | 2.94  | <i>OsYSL2</i>   |
| Os07g0258400                                | 8.13  | 13.24 | 8.25 | 14.15 | 7.05  | 13.00 | 5.27 | 14.69 | 5.11 | 5.90  | 5.96 | 9.42  | <i>OsNRAMP1</i> |

The log2 values are shown.

754

755 **FIGURE LEGENDS**

756 **Figure 1.** OsFIT physically interacts with OsIRO2.

757 **(A)** Yeast two-hybrid analysis of the interaction between OsIRO2 and OsFIT.

758 Yeast cotransformed with different BD and AD plasmid combinations was

759 spotted on synthetic dropout medium lacking Leu/Trp (SD–W/L) or

760 Trp/Leu/His/Ade (SD–W/L/H/A). **(B)** Fluorescence complementation between

761 OsIRO2 and OsFIT. Three different combinations

762 (GFP1-9/GFP10-OsIRO2/OsFIT-GFP11, GFP1-9/GFP10/OsFIT-GFP11, and

763 GFP1-9/GFP10-OsIRO2/GFP11) were co-expressed respectively in tobacco

764 leaves. **(C)** Co-IP analysis of the interaction between OsIRO2 and OsFIT. Total

765 proteins from different combinations (HA-GFP/Myc-OsIRO2 and

766 HA-OsFIT/Myc-OsIRO2) were immunoprecipitated with anti-Myc followed by

767 immunoblotting with the indicated antibodies.

768

769 **Figure 2.** OsFIT facilitates the accumulation of OsIRO2 in the nucleus.

770 **(A)** Response of *OsFIT* to Fe deficiency. Four-day-old seedlings germinated in

771 wet paper were grown in 0.1 mM Fe (III) solution (+Fe) for 5 days and then

772 transferred to +Fe or Fe free solution (–Fe) for 5 days. **(B)** *OsFIT* expression in

773 the roots and shoots. Four-day-old seedlings germinated in wet paper were

774 grown in 0.1 mM Fe (III) solution (+Fe) for 10 days. (A) and (B) Roots and

775 shoots were harvested separately and used for RNA extraction and qRT-PCR.

776 Data represent means  $\pm$  SD ( $n = 3$ ). **(C)** Subcellular localization. Different

777 combinations of OsIRO2-mCherry, OsFIT-GFP, free GFP or free mCherry were

778 expressed transiently in tobacco cells. The numbers in the parenthesis

779 indicate the relative proportion of agrobacteria in each combination.

780 Quantification of subcellular distribution of the mCherry tagged proteins are

781 shown on the right. Data represent means  $\pm$  SD ( $n = 10$ ). (A-C) Different letters

782 above each bar indicate statistically significant differences as determined by

783 one-way ANOVA followed by Tukey's multiple comparison test ( $P < 0.05$ ).

784

785 **Figure 3.** Phenotypes of *fit* mutants.

786 **(A)** CRISPR/Cas9-edited *fit* mutants. The underlined three letters indicate the  
787 PAM region. Arrows indicate the positions of single guide RNAs. The red letter  
788 indicates the 1bp insertion. The red bar indicates the bHLH domain. **(B)**  
789 Growth of *fit* mutant seedlings under aerobic conditions and water logged.  
790 Two-week-old seedling are shown. **(C)** The third leaves of seedlings in (B). **(D)**  
791 Growth of *fit* mutant seedlings. Seeds were germinated on wet paper for four  
792 days. For Fe (III) and Fe (II) growth, four-day-old seedlings germinated on wet  
793 paper were shifted in 0.1 mM Fe(III) and Fe (II) solution respectively for 10  
794 days. For –Fe growth, four-day-old seedlings germinated on wet paper were  
795 shifted to +Fe for 1 day and then transferred to –Fe for 9 days. **(E)** Fe  
796 concentration of shoots in (D). Data represent means  $\pm$  SD ( $n = 3$ ). Different  
797 letters above each bar indicate statistically significant differences as  
798 determined by one-way ANOVA followed by Tukey's multiple comparison test  
799 ( $P < 0.05$ ).

800

801 **Figure 4.** OsFIT transcriptional regulation of Fe homeostasis genes in the  
802 roots.

803 **(A)** Heat map of 741 upregulated genes and 835 downregulated genes in wild  
804 type roots. **(B)** Fe deficiency responsive genes affected by OsFIT in the roots.  
805 Among the 741 upregulated genes by –Fe in the wild-type, 367 genes were  
806 down-regulated in the *fit-1* compared with in the wild type under –Fe. Among  
807 the 835 down-regulated genes by –Fe in the wild-type, 465 genes were  
808 upregulated in the *fit-1* compared with in the wild type under –Fe.

809

810 **Figure 5.** Analysis of *OsFIT* overexpression plants.

811 **(A)** Growth of *OsFIT* overexpression plants. For +Fe growth, four-day-old  
812 seedlings germinated on wet paper were shifted in +Fe solution for 19 days.  
813 For –Fe growth, four-day-old seedlings germinated on wet paper were shifted

814 in +Fe solution for 1 day and transferred to –Fe for 18 days. **(B)** The third  
815 leaves of seedlings in (A). **(C)** Fe concentration of shoots grown in +Fe  
816 solution in (A). Data represent means  $\pm$  SD ( $n = 3$ ). Different letters above  
817 each bar indicate statistically significant differences as determined by one-way  
818 ANOVA followed by Tukey's multiple comparison test ( $P < 0.05$ ). **(D)**  
819 Expression of Fe uptake genes. Four-day-old seedlings germinated on wet  
820 paper were grown in +Fe for 5 days and then transferred to +Fe or –Fe for 5  
821 days. Roots were used for RNA extraction. Data represent means  $\pm$  SD ( $n = 3$ ).  
822 Different letters above each bar indicate statistically significant differences as  
823 determined by one-way ANOVA followed by Tukey's multiple comparison test  
824 ( $P < 0.05$ ).

825

826 **Figure 6.** Genetic interaction between OsIRO2 and OsFIT.

827 **(A)** Growth of various mutant seedlings. Seeds were germinated on wet paper  
828 for four days. For +Fe growth, four-day-old seedlings germinated on wet paper  
829 were shifted in +Fe for 10 days. For –Fe growth, four-day-old seedlings  
830 germinated on wet paper were shifted in +Fe for 1 day and transferred to –Fe  
831 for 9 days. **(B)** Fe concentration of shoots grown in +Fe solution in (A). Data  
832 represent means  $\pm$  SD ( $n = 3$ ). Different letters above each bar indicate  
833 statistically significant differences as determined by one-way ANOVA followed  
834 by Tukey's multiple comparison test ( $P < 0.05$ ). **(C)** Expression of Fe uptake  
835 genes. Four-day-old seedlings were grown in +Fe for 5 days and transferred to  
836 +Fe or –Fe for 5 days. Roots were used for RNA extraction. Data represent  
837 means  $\pm$  SD ( $n = 3$ ). Different letters above each bar indicate statistically  
838 significant differences as determined by one-way ANOVA followed by Tukey's  
839 multiple comparison test ( $P < 0.05$ ).

840

841 **Figure 7.** OsIRO2 and OsFIT mutually regulate the expression of *OsNAS2*  
842 and *OsYSL15*.

843 **(A)** EMSA showing that OsIRO2 directly binds the *OsNAS2* and *OsYSL15*

844 promoters. GST-OsIRO2 and/or OsFIT were incubated with the biotin-labeled  
845 probes. Biotin-probe, biotin-labeled probe; cold-probe, unlabeled probe;  
846 cold-probe-m, unlabeled mutated probe. Biotin probe incubated with GST  
847 served as the negative control. **(B)** Activation of target genes by OsIRO2 and  
848 OsFIT. The LUC/REN ratio represents the LUC activity relative to the internal  
849 control (REN driven by the 35S promoter). The numbers 0, 10 and 20 indicate  
850 that 0, 10, and 20  $\mu\text{g}$  of plasmid were used for the corresponding vectors in the  
851 transient expression assay. Data represent means  $\pm$  SD ( $n = 3$ ). Different  
852 letters above each bar indicate statistically significant differences as  
853 determined by one-way ANOVA followed by Tukey's multiple comparison test  
854 ( $P < 0.05$ ). **(C)** ChIP-qPCR analysis. The numbers in the parenthesis indicate  
855 the relative proportion of agrobacteria in each combination. Data represent  
856 means  $\pm$  SD ( $n = 3$ ). Different letters above each bar indicate statistically  
857 significant differences as determined by one-way ANOVA followed by Tukey's  
858 multiple comparison test ( $P < 0.05$ ).

859

860 **Figure 8.** *OsFIT* is regulated positively by the OsPRI proteins.

861 Four-day-old seedlings germinated on wet paper were grown in +Fe for 5 days  
862 and transferred to +Fe or -Fe for 5 days. Roots were used for RNA extraction.  
863 Data represent means  $\pm$ SD ( $n = 3$ ). Different letters above each bar indicate  
864 statistically significant differences as determined by one-way ANOVA followed  
865 by Tukey's multiple comparison test ( $P < 0.05$ ).

866

867 **Figure 9.** A proposed working model of OsFIT and OsIRO2.

868 Fe deficiency response pathways in rice. OsHRZ1 interacts with and inhibits  
869 OsPRI1, OsPRI2 and OsPRI3 which activate the expression of *OsIRO2*,  
870 *OsFIT* and *OsIRO3*. OsPRI4, a paralog of OsPRI1, OsPRI2 and OsPRI3, may  
871 play a redundant role in Fe homeostasis. OsIRO2 and OsFIT form a  
872 heterodimer to initiate the expression of their downstream target genes.  
873 OsIRO3 negatively regulates the expression of Fe deficiency responsive

874 genes. OsIRO2 is preferentially expressed in the cytoplasm. OsFIT is  
875 specifically expressed in the nucleus. OsFIT facilitates the nuclear  
876 accumulation of OsIRO2 in the nucleus. OsFIT and OsIRO2 function as a  
877 transcription complex to control the expression of Fe-uptake genes.

878



## Parsed Citations

**Bashir, K., Inoue, H., Nagasaka, S., Takahashi, M., Nakanishi, H., Mori, S. and Nishizawa, N.K. (2006) Cloning and characterization of deoxymugineic acid synthase genes from graminaceous plants. J.Biol.Chem. 281, 32395–32402**

Pubmed: [Author and Title](#)

Google Scholar: [Author Only Title Only Author and Title](#)

**Cheng L, Wang F, Shou H, Huang F, Zheng L, He F, Li J, Zhao FJ, Ueno D, Ma JF, Wu P. (2007). Mutation in nicotianamine aminotransferase stimulated the Fe(II) acquisition system and led to iron accumulation in rice. Plant Physiol. 145:1647-1657.**

Pubmed: [Author and Title](#)

Google Scholar: [Author Only Title Only Author and Title](#)

**Colangelo, E.P., and Guerinot, M.L. (2004) The essential bHLH protein FIT1 is required for the iron deficiency response. Plant Cell 16, 3400–3412.**

Pubmed: [Author and Title](#)

Google Scholar: [Author Only Title Only Author and Title](#)

**Connolly EL, Fett JP, Guerinot ML. (2002). Expression of the IRT1 metal transporter is controlled by metals at the levels of transcript and protein accumulation. Plant Cell. 14:1347-1357.**

Pubmed: [Author and Title](#)

Google Scholar: [Author Only Title Only Author and Title](#)

**Curie, C., Panavence, Z, Loulergue, C., Dellaporta, S.L., Briat, J.F. and Walker, E.L. (2001) Maize yellow stripe1 encodes a membrane protein directly involved in Fe(III) uptake. Nature, 409, 346–349**

Pubmed: [Author and Title](#)

Google Scholar: [Author Only Title Only Author and Title](#)

**Fisher F, Goding CR (1992) Single amino acid substitutions alter helix-loop-helix protein specificity for bases flanking the core CANNTG motif. EMBO J. 11:4103-4109.**

Pubmed: [Author and Title](#)

Google Scholar: [Author Only Title Only Author and Title](#)

**Fourcroy, P., Siso-Terraza, P., Sudre, D., Saviron, M., Rey, G., Gaymard, F., Abadia, A., Abadia, J., Alvarez-Fernandez, A., and Briat, J.F. (2014). Involvement of the ABCG37 transporter in secretion of scopoletin and derivatives by Arabidopsis roots in response to iron deficiency. New Phytologist 201:155-167.**

Pubmed: [Author and Title](#)

Google Scholar: [Author Only Title Only Author and Title](#)

**Gao F, Robe K, Gaymard F, Izquierdo E, Dubos C. (2019). The Transcriptional Control of Iron Homeostasis in Plants: A Tale of bHLH Transcription Factors? Front Plant Sci. 10:6.**

Pubmed: [Author and Title](#)

Google Scholar: [Author Only Title Only Author and Title](#)

**Gao F, Robe K, Betterbourg M, Navarro N, Rofidal V, Santoni V, Gaymard F, Vignols F, Roschztardt H, Izquierdo E, Dubos C. (2020). The Transcription Factor bHLH121 Interacts with bHLH105 (ILR3) and Its Closest Homologs to Regulate Iron Homeostasis in Arabidopsis. Plant Cell. 32:508-524.**

Pubmed: [Author and Title](#)

Google Scholar: [Author Only Title Only Author and Title](#)

**Inoue H, Kobayashi T, Nozoye T, Takahashi M, Kakei Y, Suzuki K, Nakazono M, Nakanishi H, Mori S, Nishizawa NK: Rice OsYSL15 Is an Iron-regulated Iron(III)-Deoxymugineic Acid Transporter Expressed in the Roots and Is Essential for Iron Uptake in Early Growth of the Seedlings. Biol Chem 2009, 284:10.**

Pubmed: [Author and Title](#)

Google Scholar: [Author Only Title Only Author and Title](#)

**Inoue H, Kobayashi T, Nozoye T, Takahashi M, Kakei Y, Suzuki K, Nakazono M, Nakanishi H, Mori S, Nishizawa NK. (2009). Rice OsYSL15 is an iron-regulated iron(III)-deoxymugineic acid transporter expressed in the roots and is essential for iron uptake in early growth of the seedlings. J Biol Chem. 284:3470-3479.**

Pubmed: [Author and Title](#)

Google Scholar: [Author Only Title Only Author and Title](#)

**Inoue H, Takahashi M, Kobayashi T, Suzuki M, Nakanishi H, Mori S, Nishizawa NK. (2008). Identification and localisation of the rice nicotianamine aminotransferase gene OsNAAT1 expression suggests the site of phytosiderophore synthesis in rice. Plant Mol Biol. 66:193-203.**

Pubmed: [Author and Title](#)

Google Scholar: [Author Only Title Only Author and Title](#)

**Ishimaru, Y., Suzuki, M., Tsukamoto, T., Suzuki, K., Nakazono, M., Kobayashi, T., Wada, Y., Watanabe, S., Matsushashi, S., Takahashi, M., Nakanishi, H., Mori, S., Nishizawa, N.K. (2006). Rice plants take up iron as an Fe<sup>3+</sup>-phytosiderophore and as Fe<sup>2+</sup>. Plant J. 45, 335-346.**

Pubmed: [Author and Title](#)

Google Scholar: [Author Only Title Only Author and Title](#)

**Kim SA, LaCroix IS, Gerber SA, Guerinot ML. (2019). The iron deficiency response in Arabidopsis thaliana requires the phosphorylated**

**transcription factor URI. Proc Natl Acad Sci USA. 116:24933-24942.**

Pubmed: [Author and Title](#)

Google Scholar: [Author Only Title Only Author and Title](#)

**Kobayashi, T., Nagasaka, S., Senoura, T., Itai, R.N., Nakanishi, H., Nishizawa, N.K. (2013). Iron-binding haemerythrin RING ubiquitin ligases regulate plant iron responses and accumulation. Nat Commun. 4:2792.**

Pubmed: [Author and Title](#)

Google Scholar: [Author Only Title Only Author and Title](#)

**Lee S, Chiecko JC, Kim SA, Walker EL, Lee Y, Guerinot ML, An G. (2009). Disruption of OsYSL15 leads to iron inefficiency in rice plants. Plant Physiol. 150:786-800.**

Pubmed: [Author and Title](#)

Google Scholar: [Author Only Title Only Author and Title](#)

**Li, X., Zhang, H., Ai, Q., Liang, G., and Yu, D. (2016). Two bHLH Transcription Factors, bHLH34 and bHLH104, Regulate Iron Homeostasis in Arabidopsis thaliana. Plant Physiol. 170, 2478-2493.**

Pubmed: [Author and Title](#)

Google Scholar: [Author Only Title Only Author and Title](#)

**Liang G, Zhang HM, Lou DJ, and Yu DQ. (2016). Selection of highly efficient sgRNAs for CRISPR/Cas9-based plant genome editing. Scientific Reports 6: 21451.**

Pubmed: [Author and Title](#)

Google Scholar: [Author Only Title Only Author and Title](#)

**Liang, G., Zhang, H.M., Li, X.L., Ai, Q., and Yu, D. (2017). bHLH transcription factor bHLH115 regulates iron homeostasis in Arabidopsis thaliana. J. Exp. Bot. 68(7):1743-1755.**

Pubmed: [Author and Title](#)

Google Scholar: [Author Only Title Only Author and Title](#)

**Liu TY, Chou WC, Chen WY, Chu CY, Dai CY, Wu PY. (2018) Detection of membrane protein-protein interaction in planta based on dual-intein-coupled tripartite split-GFP association. Plant J. 94:426-438.**

Pubmed: [Author and Title](#)

Google Scholar: [Author Only Title Only Author and Title](#)

**Liu C, Gao T, Liu Y, Liu J, Li F, Chen Z, Li Y, Lv Y, Song Z, Reinfelder J, Huang W. (2019). Isotopic fingerprints indicate distinct strategies of Fe uptake in rice. Chemical Geology. 524:323–328.**

Pubmed: [Author and Title](#)

Google Scholar: [Author Only Title Only Author and Title](#)

**Marschner H, Römheld V, Kissel M: Different strategies in higher plants in mobilization and uptake of iron. J Plant Nutr 1986, 9:695-713.**

Pubmed: [Author and Title](#)

Google Scholar: [Author Only Title Only Author and Title](#)

**Mori, S. (1999). Iron acquisition by plants. Curr. Opin. Plant Biol. 2, 250–253**

Pubmed: [Author and Title](#)

Google Scholar: [Author Only Title Only Author and Title](#)

**Murata Y, Ma JF, Yamaji N, Ueno D, Nomoto K, Iwashita T (2006) A specific transporter for iron(III)-phytosiderophore in barley roots. Plant J 46: 563-572.**

Pubmed: [Author and Title](#)

Google Scholar: [Author Only Title Only Author and Title](#)

**Nozoye T, Nagasaka S, Kobayashi T, Takahashi M, Sato Y, Sato Y, Uozumi N, Nakanishi H, Nishizawa NK. (2011). Phytosiderophore efflux transporters are crucial for iron acquisition in graminaceous plants. J Biol Chem. 286:5446-5454**

Pubmed: [Author and Title](#)

Google Scholar: [Author Only Title Only Author and Title](#)

**Ogo Y, Itai RN, Nakanishi H, Inoue H, Kobayashi T, Suzuki M, Takahashi M, Mori S, Nishizawa NK. (2006). Isolation and characterization of IRO2, a novel iron-regulated bHLH transcription factor in graminaceous plants. J Exp Bot. 57: 2867-2878.**

Pubmed: [Author and Title](#)

Google Scholar: [Author Only Title Only Author and Title](#)

**Ogo Y, Itai RN, Nakanishi H, Kobayashi T, Takahashi M, Mori S, Nishizawa NK (2007) The rice bHLH protein OsIRO2 is an essential regulator of the genes involved in Fe uptake under Fe-deficient conditions. Plant J 51: 366-377.**

Pubmed: [Author and Title](#)

Google Scholar: [Author Only Title Only Author and Title](#)

**Robinson, N.J., Procter, C.M., Connolly, E.L., and Guerinot, M.L.(1999). A ferric-chelate reductase for iron uptake from soils. Nature 397, 694–697.**

Pubmed: [Author and Title](#)

Google Scholar: [Author Only Title Only Author and Title](#)

**Rodriguez-Celma, J., and Schmidt, W. (2013). Reduction-based iron uptake revisited: on the role of secreted iron-binding compounds. Plant signaling & behavior 8:e26116.**

Pubmed: [Author and Title](#)

Google Scholar: [Author Only](#) [Title Only](#) [Author and Title](#)

**Santi, S., and Schmidt, W. (2009).** Dissecting iron deficiency-induced proton extrusion in *Arabidopsis* roots. *New Phytol.* 183:1072-1084.

Pubmed: [Author and Title](#)

Google Scholar: [Author Only](#) [Title Only](#) [Author and Title](#)

**Schmid, N.B., Giehl, R.F.H., Doll, S., Mock, H.P., Strehmel, N., Scheel, D., Kong, X.L., Hider, R.C., and von Wiren, N. (2014).** Feruloyl-CoA 6'-Hydroxylase-1-Dependent Coumarins Mediate Iron Acquisition from Alkaline Substrates in *Arabidopsis*. *Plant Physiol.* 164:160-172.

Pubmed: [Author and Title](#)

Google Scholar: [Author Only](#) [Title Only](#) [Author and Title](#)

**Schwarz B, and Bauer P. (2020).** FIT, a regulatory hub for iron deficiency and stress signaling in roots, and FIT-dependent and -independent gene signatures. *J Exp Bot.* doi: 10.1093/jxb/eraa012.

Pubmed: [Author and Title](#)

Google Scholar: [Author Only](#) [Title Only](#) [Author and Title](#)

**Selote D, Samira R, Matthiadis A, Gillikin JW, Long TA (2015)** Iron-binding E3 ligase mediates iron response in plants by targeting basic helix-loop-helix transcription factors. *Plant Physiol.* 167: 273-286.

Pubmed: [Author and Title](#)

Google Scholar: [Author Only](#) [Title Only](#) [Author and Title](#)

**Shojima, S., Nishizawa, N.K., Fushiya, S., Nozoe, S., Irifune, T. and Mori, S. (1990).** Biosynthesis of phytosiderophores. In-vitro biosynthesis of 2'-deoxymugineic acid from L-methionine and nicotianamine. *Plant Physiol.* 93, 1497–1503

Pubmed: [Author and Title](#)

Google Scholar: [Author Only](#) [Title Only](#) [Author and Title](#)

**Siwinska, J., Siatkowska, K., Olry, A., Grosjean, J., Hehn, A., Bourgaud, F., Meharg, A.A., Carey, M., Lojkowska, E., and Ilnatowicz, A (2018).** Scopoletin 8-hydroxylase: a novel enzyme involved in coumarin biosynthesis and iron-deficiency responses in *Arabidopsis*. *Journal Of Experimental Botany* 69:1735-1748.

Pubmed: [Author and Title](#)

Google Scholar: [Author Only](#) [Title Only](#) [Author and Title](#)

**Trofimov K, Ivanov R, Eutebach M, Acaroglu B, Mohr I, Bauer P, Brumbarova T. (2019).** Mobility and localization of the iron deficiency-induced transcription factor bHLH039 change in the presence of FIT. *Plant Direct.* 3(12):e00190.

Pubmed: [Author and Title](#)

Google Scholar: [Author Only](#) [Title Only](#) [Author and Title](#)

**Tsai, H.H., Rodriguez-Celma, J., Lan, P., Wu, Y.C., Velez-Bermudez, I.C., and Schmidt, W. (2018).** Scopoletin 8-Hydroxylase-Mediated Fraxetin Production Is Crucial for Iron Mobilization. *Plant Physiol.* 177:194-207.

Pubmed: [Author and Title](#)

Google Scholar: [Author Only](#) [Title Only](#) [Author and Title](#)

**Varotto, C., Maiwald, D., Pesaresi, P., Jahns, P., Salamini, F., and Leister, D. (2002).** The metal ion transporter IRT1 is necessary for iron homeostasis and efficient photosynthesis in *Arabidopsis thaliana*. *Plant J.* 31, 589-599.

Pubmed: [Author and Title](#)

Google Scholar: [Author Only](#) [Title Only](#) [Author and Title](#)

**Vert, G., Grotz, N., De ´dalde ´champ, F., Gaymard, F., Guerinot, M.L., Briat, J.F., and Curie, C. (2002).** IRT1, an *Arabidopsis* transporter essential for iron uptake from the soil and for plant growth. *Plant Cell* 14, 1223-1233.

Pubmed: [Author and Title](#)

Google Scholar: [Author Only](#) [Title Only](#) [Author and Title](#)

**Vert G, Barberon M, Zelazny E, Séguéla M, Briat JF, Curie C. (2009).** *Arabidopsis* IRT2 cooperates with the high-affinity iron uptake system to maintain iron homeostasis in root epidermal cells. *Planta.* 229:1171-1179.

Pubmed: [Author and Title](#)

Google Scholar: [Author Only](#) [Title Only](#) [Author and Title](#)

**Wang, N., Cui, Y., Liu, Y., Fan, H., Du, J., Huang, Z., Yuan, Y., Wu, H., and Ling, H.Q. (2013)** Requirement and functional redundancy of Ib subgroup bHLH proteins for iron deficiency responses and uptake in *Arabidopsis thaliana*. *Mol Plant* 6, 503-513.

Pubmed: [Author and Title](#)

Google Scholar: [Author Only](#) [Title Only](#) [Author and Title](#)

**Wang S, Li L, Ying Y, Wang J, Shao JF, Yamaji N, Whelan J, Ma JF, Shou H.(2020).** A transcription factor OsbHLH156 regulates Strategy II iron acquisition through localising IRO2 to the nucleus in rice. *New Phytol.* 225: 1247-1260.

Pubmed: [Author and Title](#)

Google Scholar: [Author Only](#) [Title Only](#) [Author and Title](#)

**Wu H, and Ling HQ. (2019).** FIT-Binding Proteins and Their Functions in the Regulation of Fe Homeostasis. *Front Plant Sci.* 10:844.

Pubmed: [Author and Title](#)

Google Scholar: [Author Only](#) [Title Only](#) [Author and Title](#)

**Xie, X., Ma, X., Zhu, Q., Zeng, D., Li, G., Liu, Y.G. (2017).** CRISPR-GE: A Convenient Software Toolkit for CRISPR-Based Genome Editing. *Molecular Plant* 10:1246-1249.

Pubmed: [Author and Title](#)

Google Scholar: [Author Only](#) [Title Only](#) [Author and Title](#)

**Yoo SD, Cho YH, Sheen J (2007). Arabidopsis mesophyll protoplasts: a versatile cell system for transient gene expression analysis. Nat Protoc 2:1565-1572.**

Pubmed: [Author and Title](#)

Google Scholar: [Author Only](#) [Title Only](#) [Author and Title](#)

**Yuan Y, Wu H, Wang N, Li J, Zhao W, Du J, Wang D, Ling HQ (2008). FIT interacts with AtbHLH38 and AtbHLH39 in regulating iron uptake gene expression for iron homeostasis in Arabidopsis. Cell Res 18: 385–397.**

Pubmed: [Author and Title](#)

Google Scholar: [Author Only](#) [Title Only](#) [Author and Title](#)

**Zhang H, Li Y, Yao X, Liang G, Yu D. (2017) POSITIVE REGULATOR OF IRON HOMEOSTASIS1, OsPRI1, facilitates iron homeostasis. Plant Physiol. 175: 543-554.**

Pubmed: [Author and Title](#)

Google Scholar: [Author Only](#) [Title Only](#) [Author and Title](#)

**Zhang H, Yang Li, Xu P, Liang G, Yu D (2020). Oryza sativa POSITIVE REGULATOR OF IRON DEFICIENCY RESPONSE 2 (OsPRI2) and OsPRI3 are involved in the maintenance of Fe homeostasis. Plant Cell and Environment. 43:261-274.**

Pubmed: [Author and Title](#)

Google Scholar: [Author Only](#) [Title Only](#) [Author and Title](#)

**Zhang, J., Liu, B., Li, M., Feng, D., Jin, H., Wang, P., Liu, J., Xiong, F., Wang, J., and Wang, H.B. (2015). The bHLH Transcription Factor bHLH104 Interacts with IAA-LEUCINE RESISTANT3 and Modulates Iron Homeostasis in Arabidopsis. Plant Cell 27, 787-805.**

Pubmed: [Author and Title](#)

Google Scholar: [Author Only](#) [Title Only](#) [Author and Title](#)

**Zhang Y, Su J, Duan S, Ao Y, Dai J, Liu J, Wang P, Li Y, Liu B, Feng D, Wang J, Wang H. (2011) A highly efficient rice green tissue protoplast system for transient gene expression and studying light/chloroplast-related processes. Plant Methods 7: 30.**

Pubmed: [Author and Title](#)

Google Scholar: [Author Only](#) [Title Only](#) [Author and Title](#)

**Zheng L, Ying Y, Wang L, Wang F, Whelan J, Shou H (2010) Identification of a novel iron regulated basic helix-loop-helix protein involved in Fe homeostasis in Oryza sativa. BMC Plant Biol 10:166.**

Pubmed: [Author and Title](#)

Google Scholar: [Author Only](#) [Title Only](#) [Author and Title](#)

**Zhu QL, Yang ZF, Zhang QY, Chen LT, Liu YG. (2014). Robust multi-type plasmid modifications based on isothermal in vitro recombination. Gene. 548:39-42.**

Pubmed: [Author and Title](#)

Google Scholar: [Author Only](#) [Title Only](#) [Author and Title](#)
